# Supplementary material for: Synthesis of spiroimidazopyridineoxindole, spiropyridopyrimidineoxindole and spiropyridodiazepineoxindole derivatives based on heterocyclic ketene aminals via a four-component reaction
Source: Royal Society of Chemistry journal article supplement (doi:10.1039/c8ra10379h), 2019-01-01
Supplement: c8ra10379h1.pdf [file c8ra10379h1.pdf]

## Supporting Information

### Synthesis of Spiroimidazopyridineoxindole, Spiropyridopyrimidineoxindole and Spiropyridodiazepineoxindole Structures Based on Heterocyclic Ketene Aminals *via* a Four- Component Reaction

Fatemeh Rahimi, Mohammad Bayat\*, Hajar Hosseini

*Chemistry Department, Imam Khomeini International University, Qazvin, Iran*

*e-mail: bayat\_mo@yahoo.com, m.bayat@sci.ikiu.ac.ir*

#### The Table of Contents

| Title                                                                                                                               | Page  |
|-------------------------------------------------------------------------------------------------------------------------------------|-------|
| Title, author's name, address and table of contents                                                                                 | 1     |
| Experimental Section; General remarks                                                                                               | 2     |
| <b>Figure 1.</b> The $^1\text{H}$ and $^{13}\text{C}$ NMR chemical shifts of <b>5a</b>                                              | 2     |
| <b>Figure 2.</b> Structure of all products <b>5</b>                                                                                 | 3     |
| $^1\text{H}$ and $^{13}\text{C}$ NMR and IR and Mass spectrums of <b>5a</b>                                                         | 4-7   |
| $^1\text{H}$ and $^{13}\text{C}$ NMR and IR and Mass spectrums of <b>5b</b>                                                         | 8-11  |
| $^1\text{H}$ and $\text{D}_2\text{O}$ exchange and $^{13}\text{C}$ NMR and IR and Mass spectrums of <b>5c</b>                       | 12-16 |
| $^1\text{H}$ and $\text{D}_2\text{O}$ exchange and $^{13}\text{C}$ NMR (in DMSO and $\text{CDCl}_3$ ) and IR spectrums of <b>5d</b> | 17-20 |
| $^1\text{H}$ and $^{13}\text{C}$ NMR and Mass spectrums of <b>5e</b>                                                                | 21-23 |
| $^1\text{H}$ and $^{13}\text{C}$ NMR spectrums of <b>5f</b>                                                                         | 24-25 |
| $^1\text{H}$ and $^{13}\text{C}$ NMR spectrums of <b>5g</b>                                                                         | 26-27 |
| $^1\text{H}$ and $^{13}\text{C}$ NMR spectrums of <b>5h</b>                                                                         | 28-29 |
| $^1\text{H}$ and expand and $^{13}\text{C}$ NMR spectrums of <b>5i</b>                                                              | 30-32 |
| $^1\text{H}$ and $^{13}\text{C}$ NMR spectrums of <b>5j</b>                                                                         | 33-34 |

## Experimental Section

### General remarks:

Melting points were measured on an Electrothermal 9100 apparatus. Mass spectra were recorded with an Agilent 5975C VL MSD with Triple-Axis Detector operating at an ionization potential of 70 Ev.  $^1\text{H}$  and  $^{13}\text{C}$  NMR spectra were measured (DMSO) with a Bruker DRX-300 AVANCE spectrometer at 300 and 75 MHz, respectively. IR spectra were recorded on a Bruker Tensor 27,  $\bar{\nu}$  in  $\text{cm}^{-1}$ . All NMR spectra at room temperature were determined in  $\text{DMSO-}d_6$ . Chemical shifts are reported in parts per million ( $\delta$ ) downfield from an internal tetramethylsilane reference. Coupling constants ( $J$  values) are reported in hertz (Hz), and spin multiplicities are indicated by the following symbols: s (singlet), d (doublet), t (triplet), q (quartet), m (multiplet). All chemicals were purchased from Merck or Aldrich and were used without further purification.

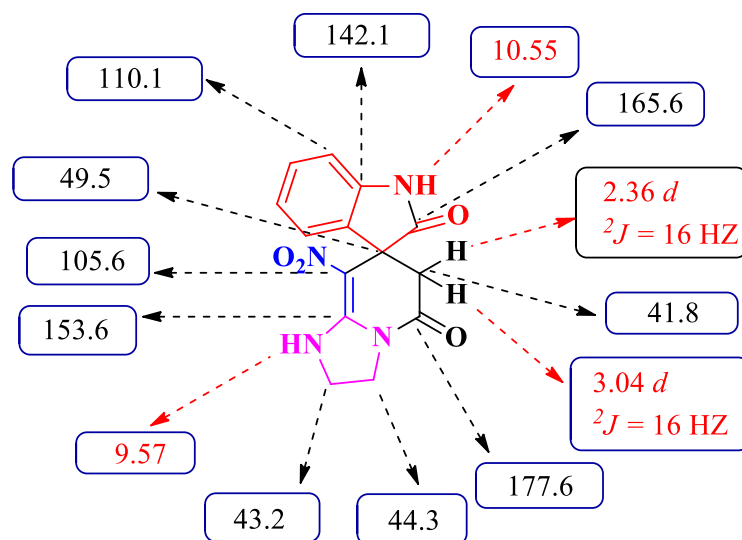

**Figure 1.** The  $^1\text{H}$  and  $^{13}\text{C}$  NMR chemical shifts of **5a**.

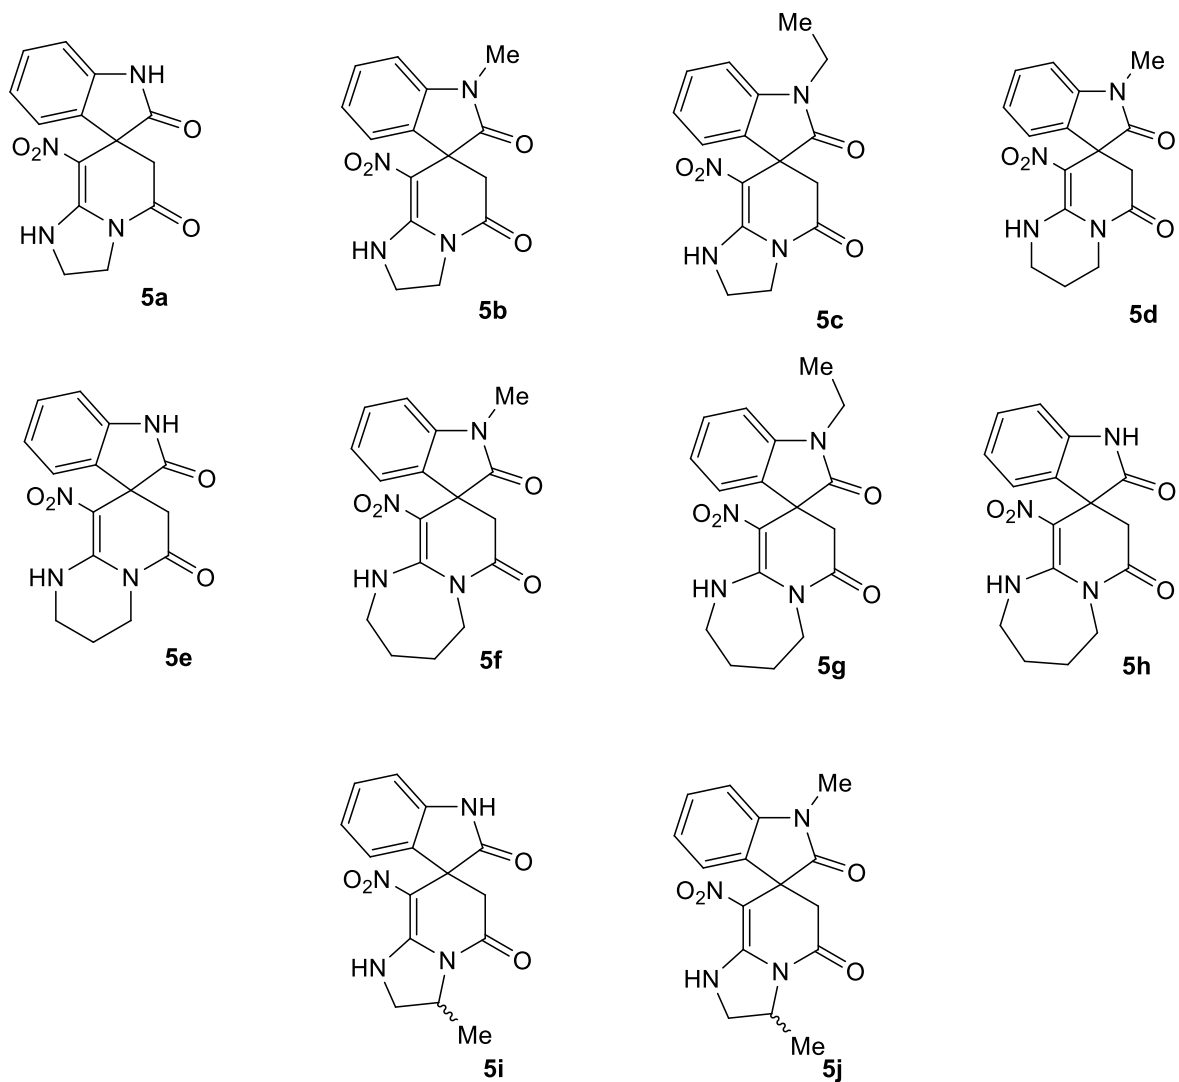

**Figure 2.** Structure of all products **5**

The structures of all products **5a-j** were deduced from their IR, mass,  $^1\text{H}$  NMR, and  $^{13}\text{C}$  NMR spectra.

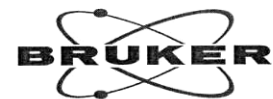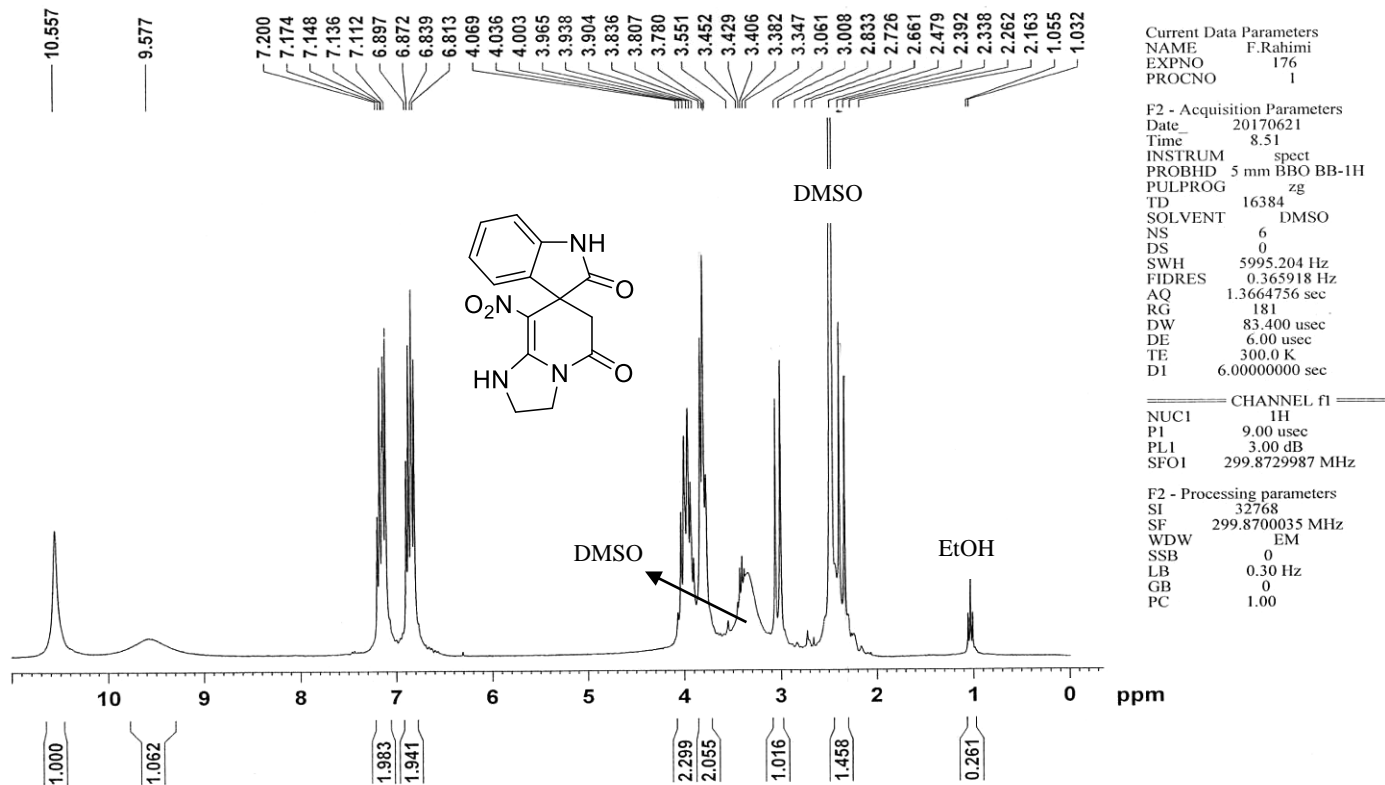

<sup>1</sup>H NMR of 5a

## R1 CNMR

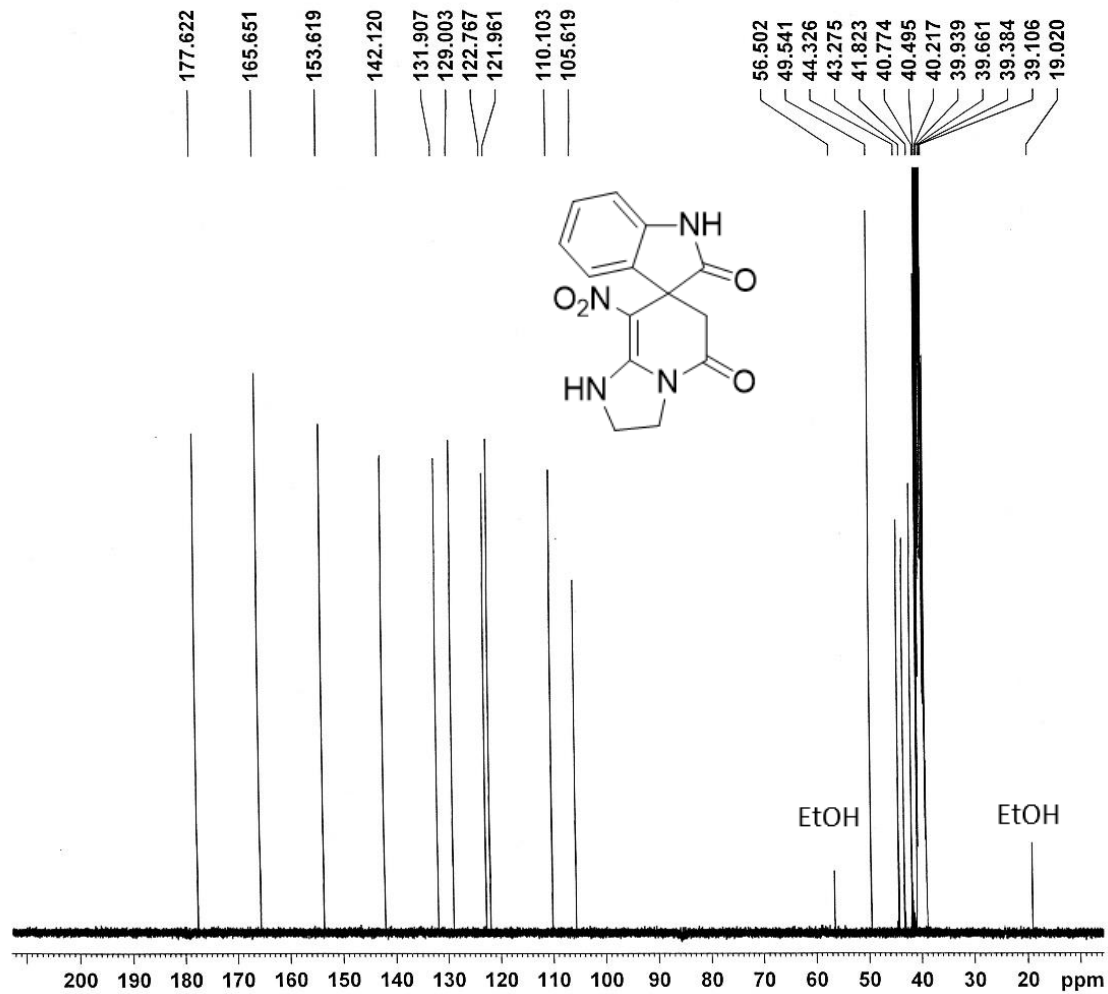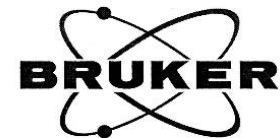

Current Data Parameters  
 NAME F.Rahimi  
 EXPNO 183  
 PROCNO 1

F2 - Acquisition Parameters  
 Date\_ 20170624  
 Time\_ 13.38  
 INSTRUM spect  
 PROBHD 5 mm BBO BB-1H  
 PULPROG zgpg  
 TD 65536  
 SOLVENT DMSO  
 NS 300  
 DS 0  
 SWH 15822.785 Hz  
 FIDRES 0.241437 Hz  
 AQ 2.0709877 sec  
 RG 32768  
 DW 31.600 usec  
 DE 6.00 usec  
 TE 300.0 K  
 D1 4.00000000 sec  
 d11 0.03000000 sec  
 d12 0.00002000 sec

===== CHANNEL f1 =====  
 NUC1 13C  
 P1 14.00 usec  
 PL1 -6.00 dB  
 SFO1 75.4102882 MHz

===== CHANNEL f2 =====  
 CPDPRG2 waltz16  
 NUC2 1H  
 PCPD2 80.00 usec  
 PL2 3.00 dB  
 PL12 23.00 dB  
 PL13 23.00 dB  
 SFO2 299.8711995 MHz

F2 - Processing parameters  
 SI 32768  
 SF 75.4023710 MHz  
 WDW EM  
 SSB 0  
 LB 1.00 Hz  
 GB 0  
 PC 1.40

<sup>13</sup>C NMR of 5a

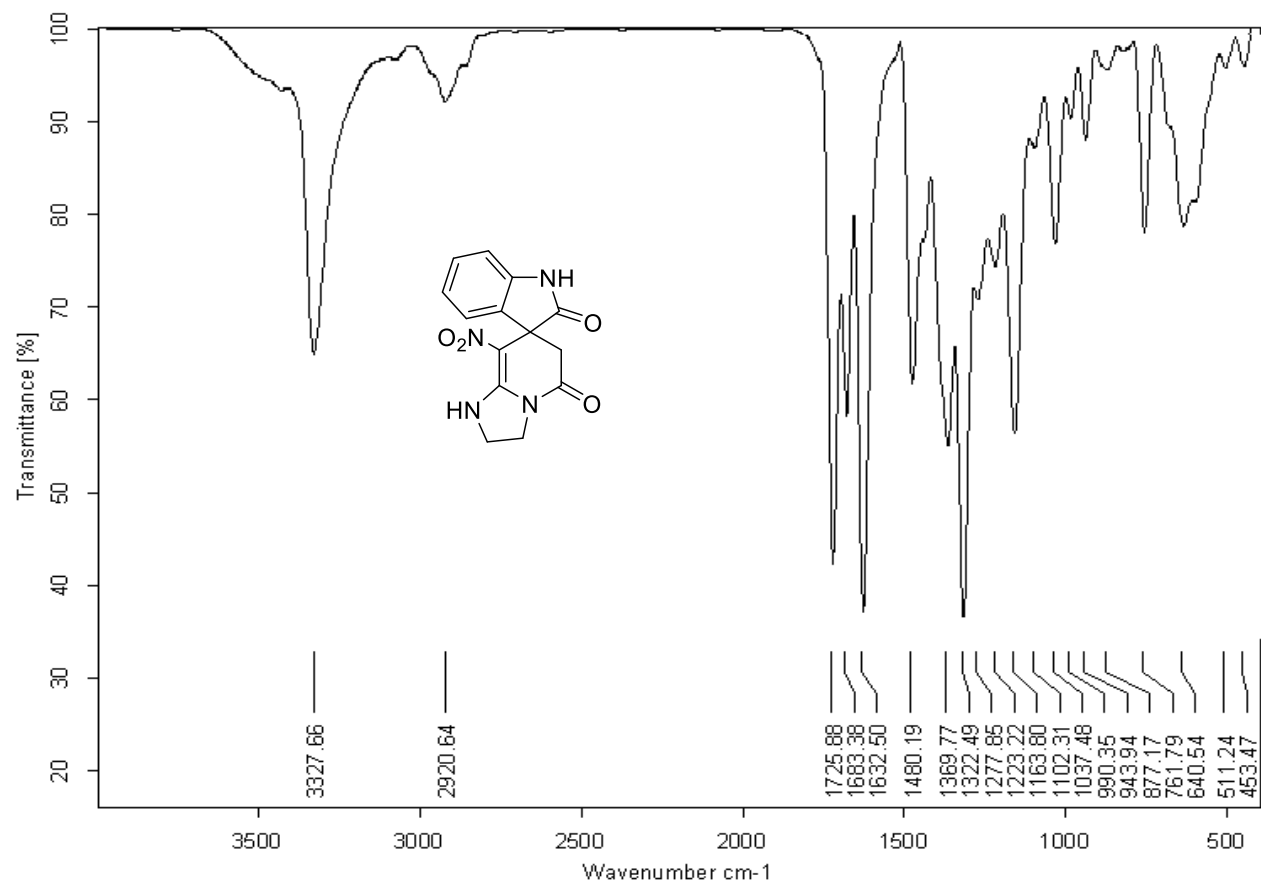**IR of 5a**

Abundance

Scan 194 (1.823 min): 30000974.D

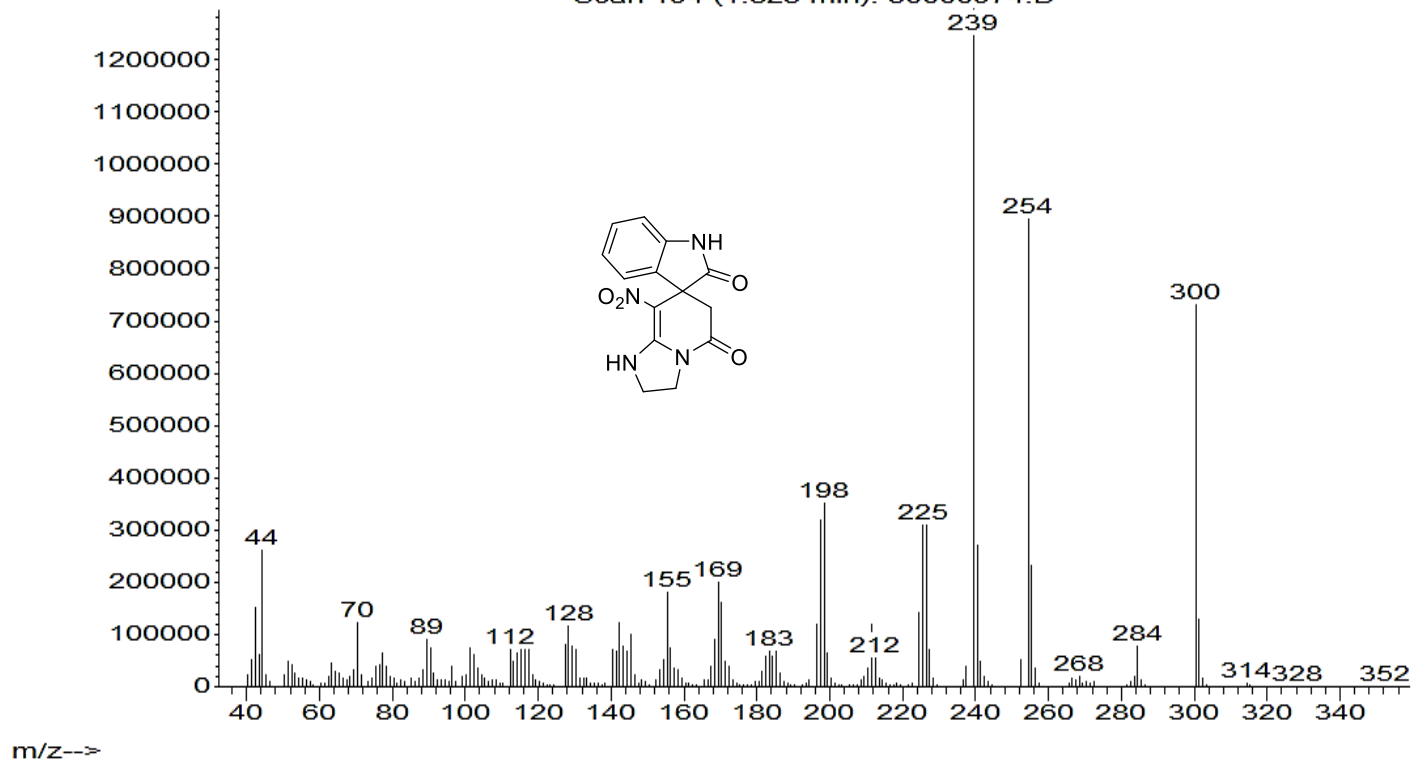

Mass of 5a

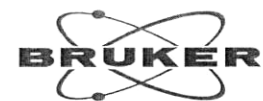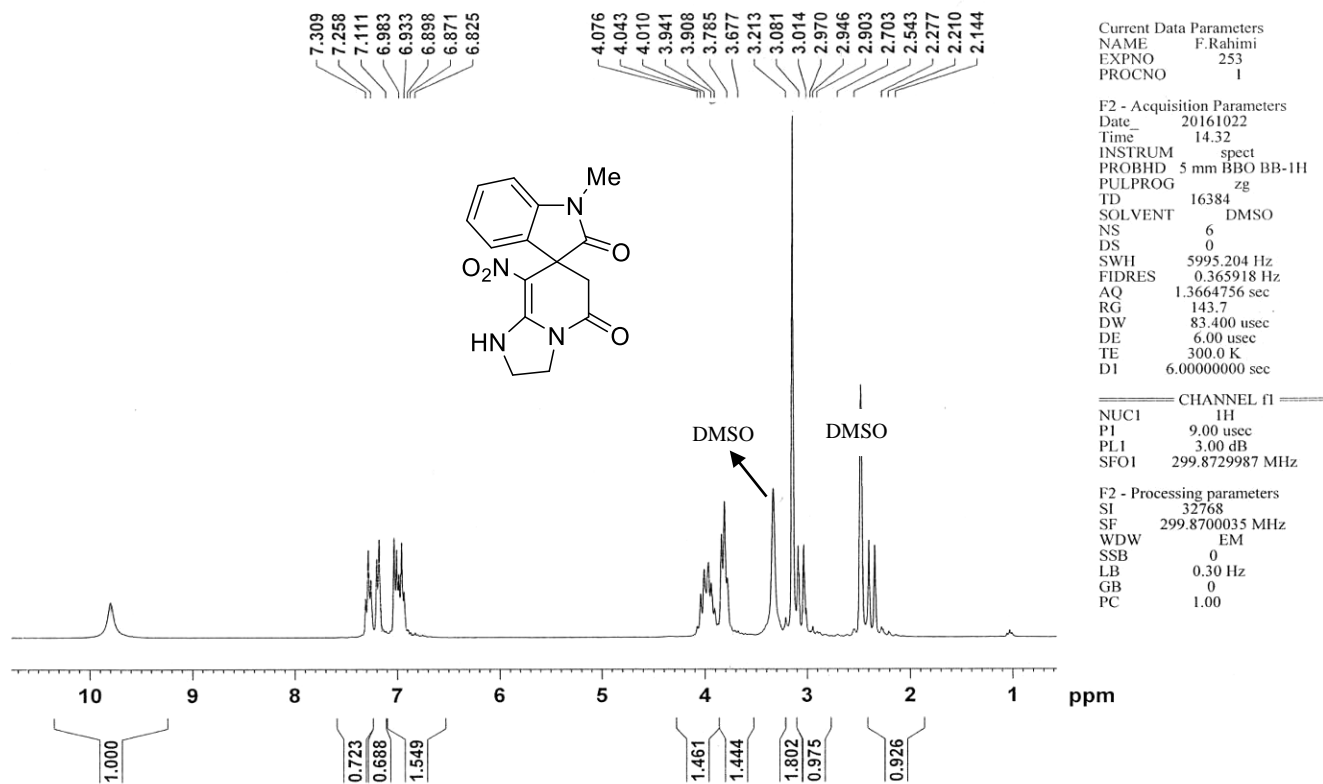

**<sup>1</sup>H NMR of 5b**



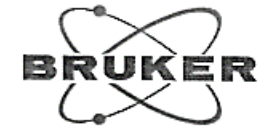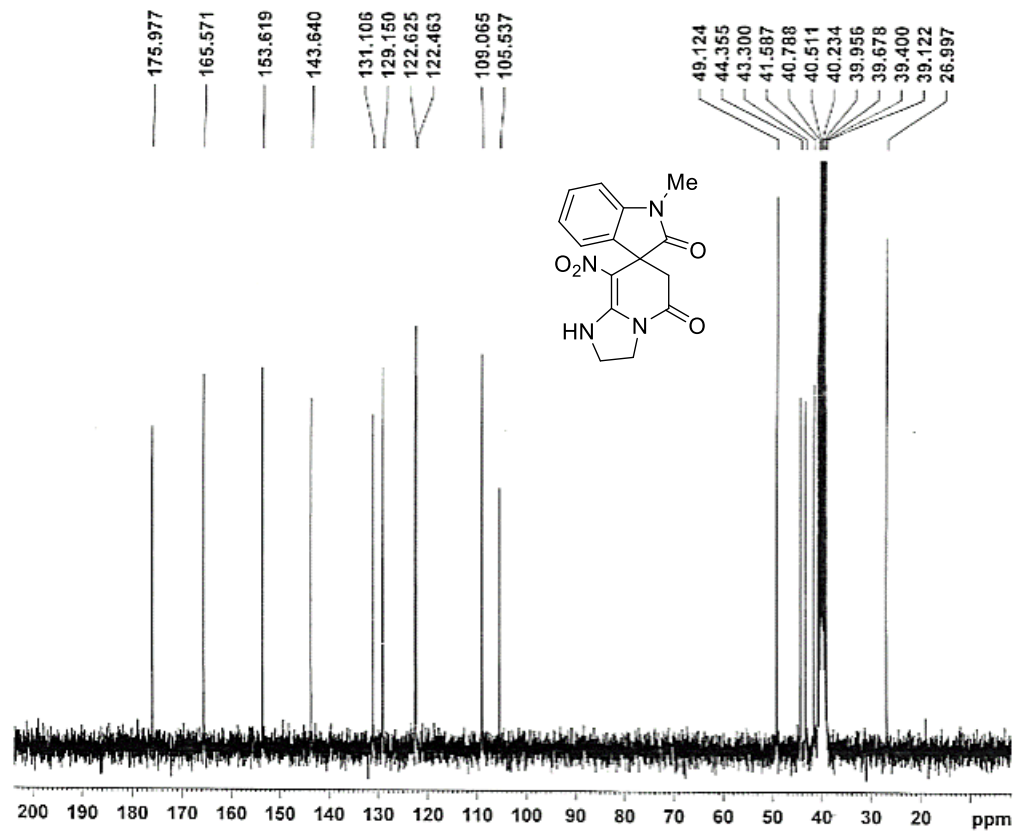

Current Data Parameters  
 NAME F.Rahimi  
 EXPNO 254  
 PROCNO 1

F2 - Acquisition Parameters  
 Date\_ 20161024  
 Time 14.06  
 INSTRUM spect  
 PROBHD 5 mm BBO BB-1H  
 PULPROG zgpg  
 TD 65536  
 SOLVENT DMSO  
 NS 350  
 DS 0  
 SWH 15022.785 Hz  
 FIDRES 0.241437 Hz  
 AQ 2.0709877 sec  
 RG 32768  
 DW 31.600 usec  
 DE 6.00 usec  
 TE 300.0 K  
 D1 4.00000000 sec  
 d11 0.03000600 sec  
 d12 0.00002000 sec

----- CHANNEL f1 -----  
 NUC1 13C  
 P1 14.00 usec  
 PL1 -6.00 dB  
 SFO1 75.4102882 MHz

===== CHANNEL f2 =====  
 CPDPRG2 waltz16  
 NUC2 1H  
 PCPD2 80.00 usec  
 PL2 3.00 dB  
 PL12 23.00 dB  
 PL13 23.00 dB  
 SFO2 299.8711995 MHz

F2 - Processing parameters  
 SI 32768  
 SF 75.4023710 MHz  
 WDW EM  
 SSB 0  
 LB 1.00 Hz  
 GB 0  
 PC 1.40

<sup>13</sup>C NMR of 5b

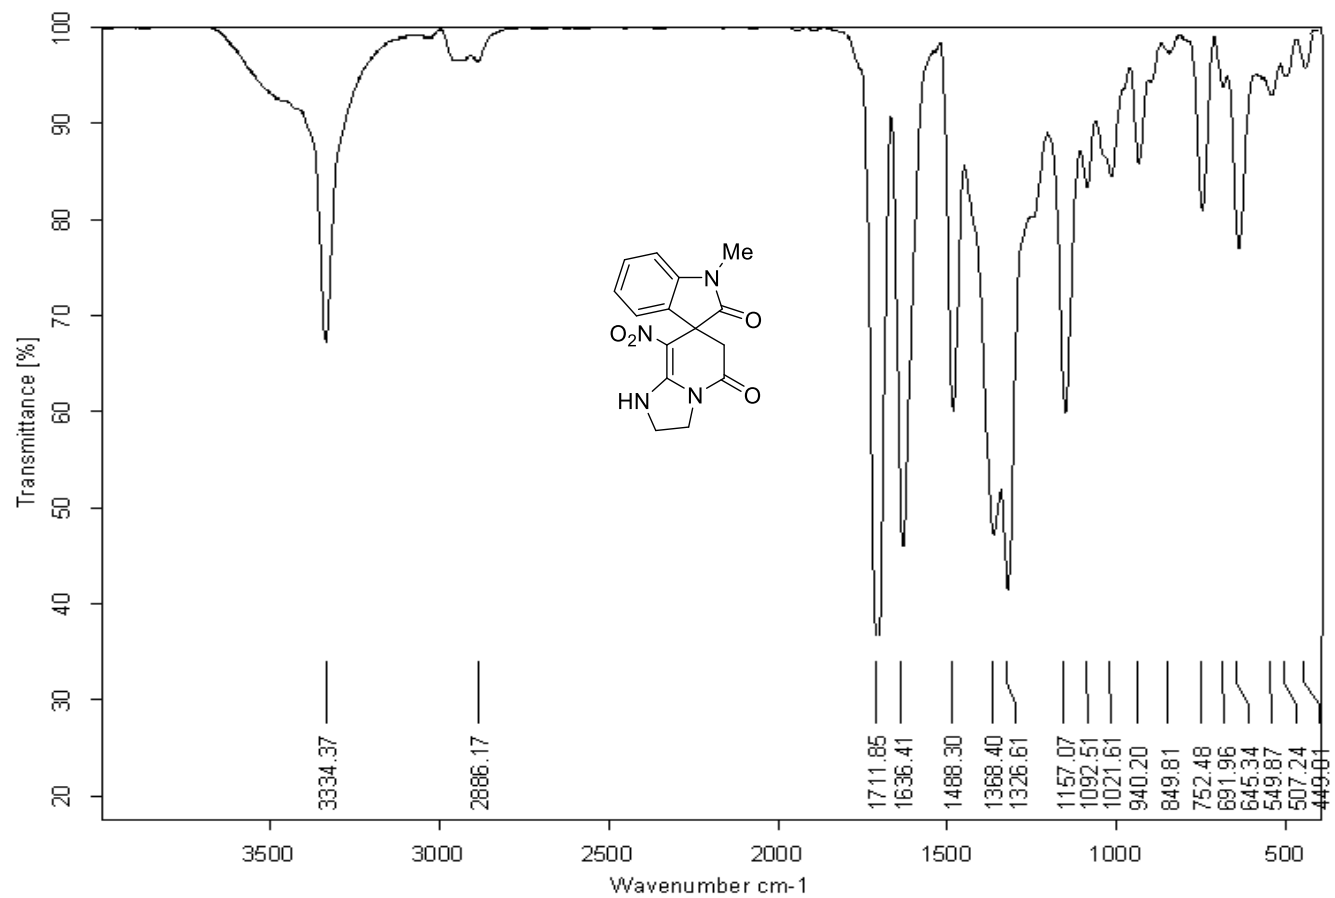**IR of 5b**

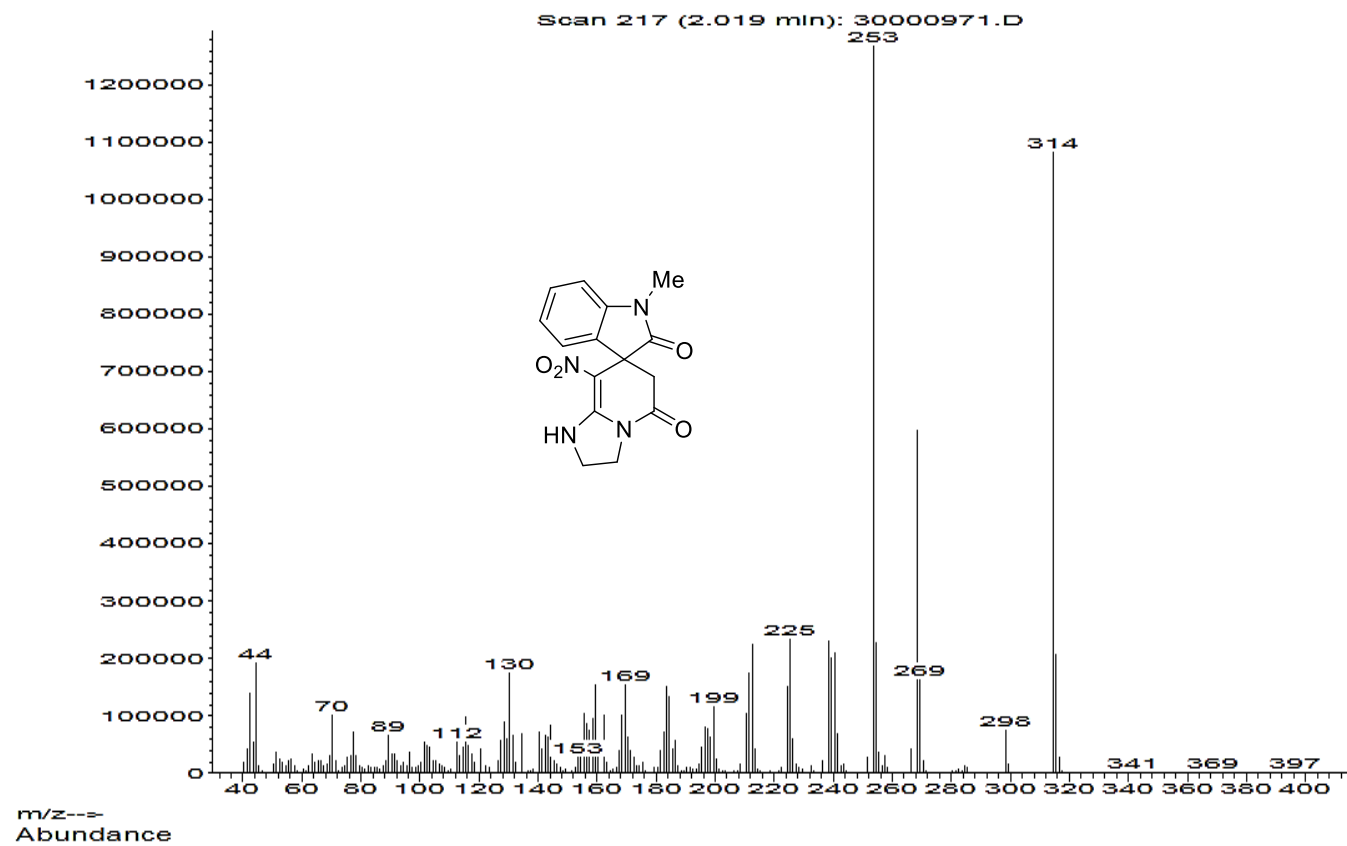

Mass of 5b

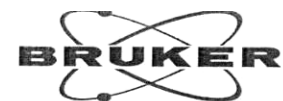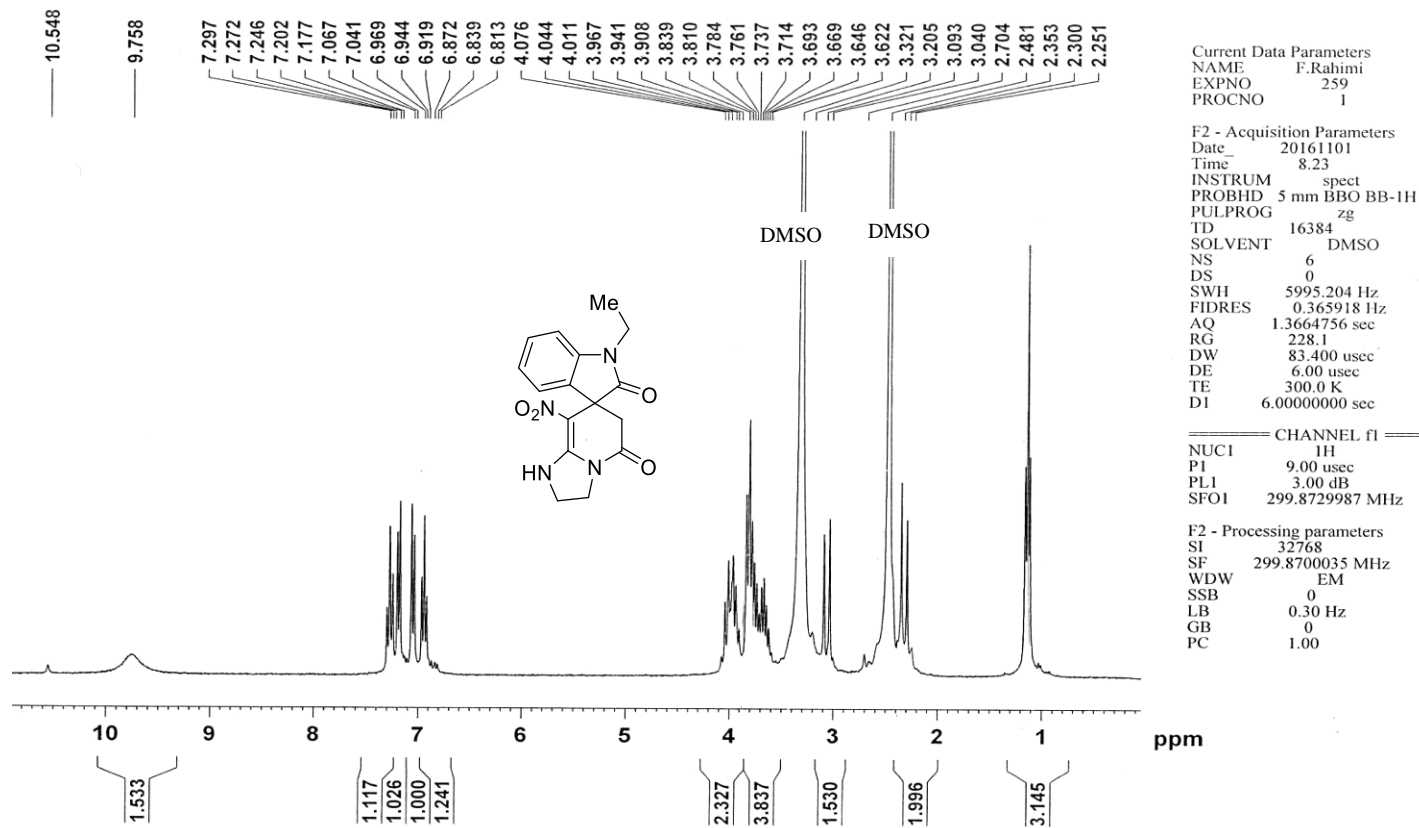

<sup>1</sup>H NMR of 5c

c

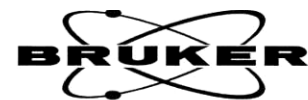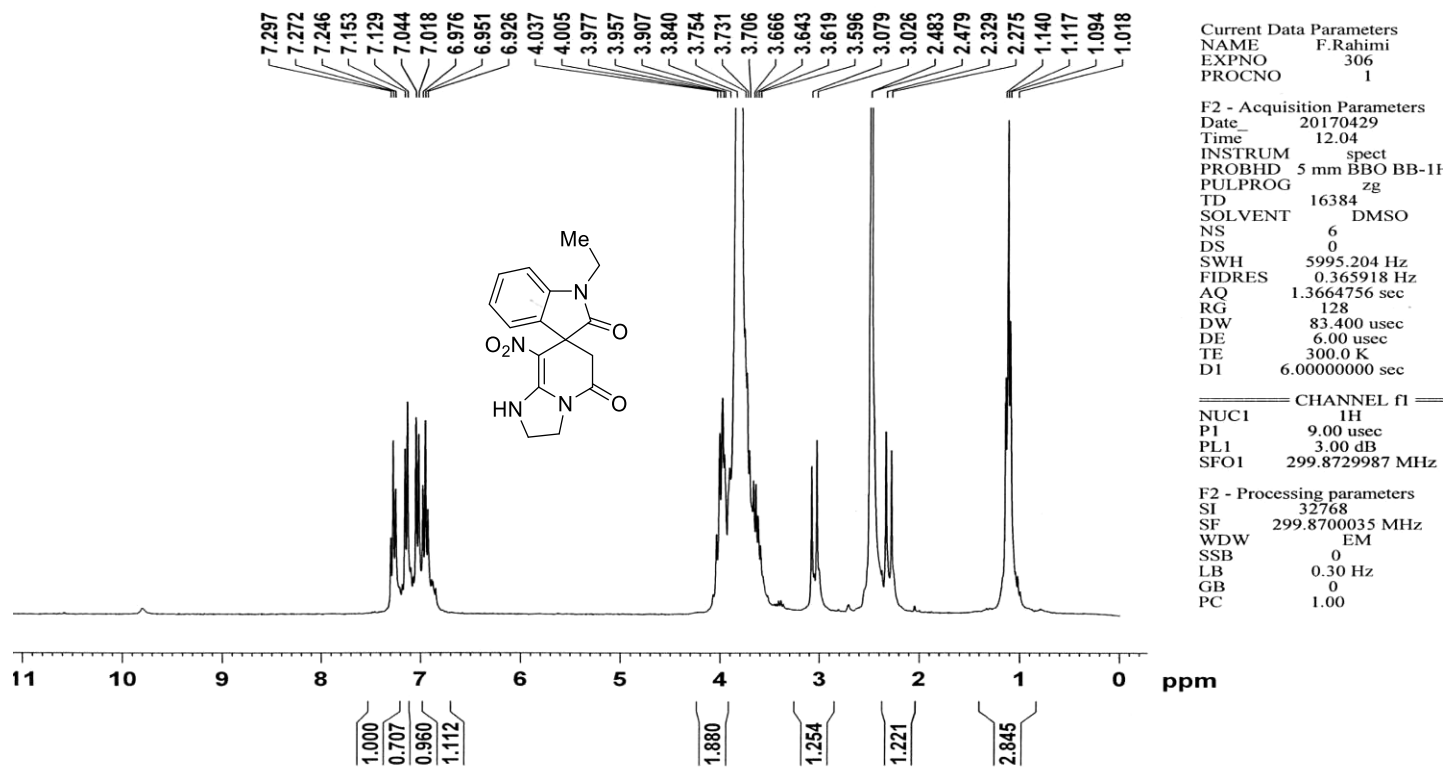

<sup>1</sup>H NMR with D<sub>2</sub>O of 5c

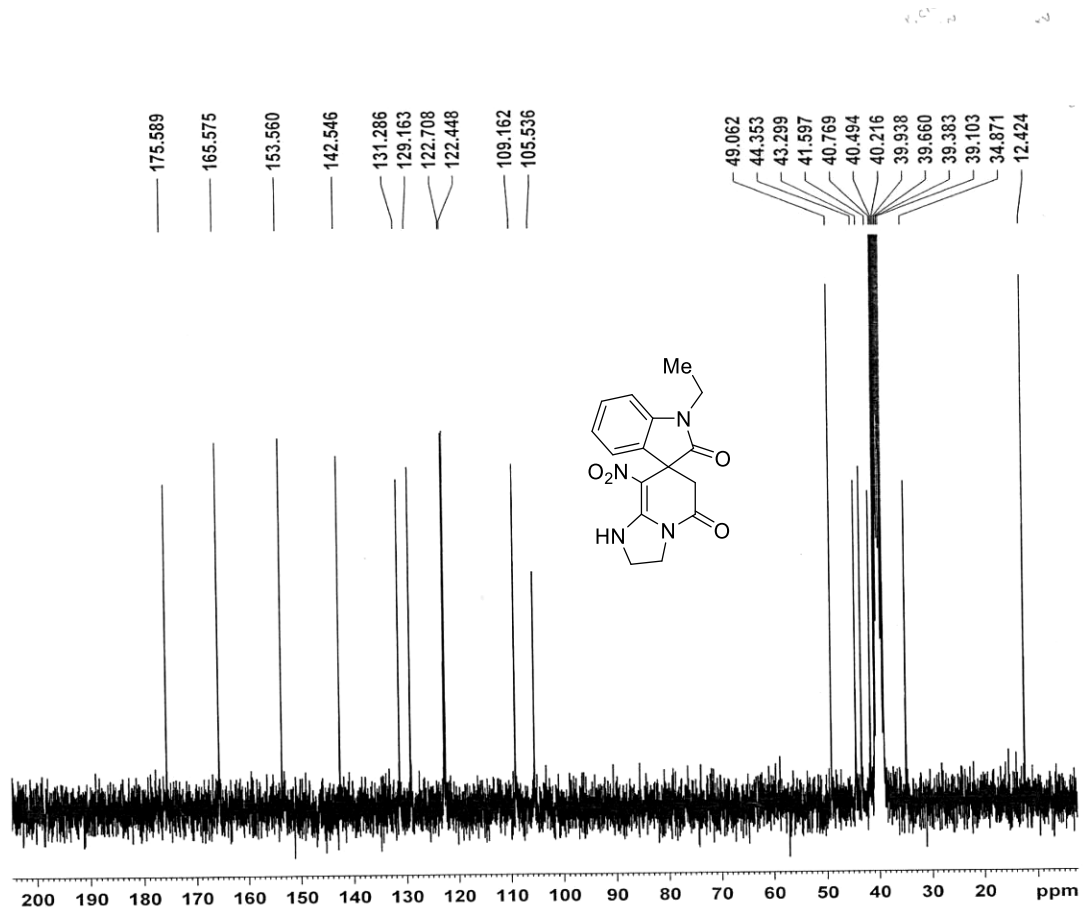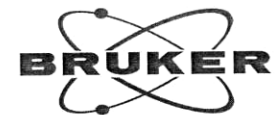

Current Data Parameters  
 NAME F.Rahimi  
 EXFNO 267  
 PROCNO 1

F2 - Acquisition Parameters  
 Date\_ 20161121  
 Time 9.38  
 INSTRUM spect  
 PROBHD 5 mm BBO BB-1H  
 PULPROG zgpg  
 TD 65536  
 SOLVENT DMSO  
 NS 570  
 DS 0  
 SWH 15822.785 Hz  
 FIDRES 0.241437 Hz  
 AQ 2.0709877 sec  
 RG 32768  
 DW 31.600 usec  
 DE 6.00 usec  
 TE 300.0 K  
 D1 4.00000000 sec  
 d11 0.03000000 sec  
 d12 0.00002000 sec

===== CHANNEL f1 =====  
 NUC1 13C  
 P1 14.00 usec  
 PL1 -6.00 dB  
 SFO1 75.4102882 MHz

===== CHANNEL f2 =====  
 CPDPRG2 waltz16  
 NUC2 1H  
 PCPD2 80.00 usec  
 PL2 3.00 dB  
 PL12 23.00 dB  
 PL13 23.00 dB  
 SFO2 299.8711995 MHz

F2 - Processing parameters  
 SI 32768  
 SF 75.4023710 MHz  
 WDW EM  
 SSB 0  
 LB 1.00 Hz  
 GB 0  
 PC 1.40

<sup>13</sup>C NMR of 5c

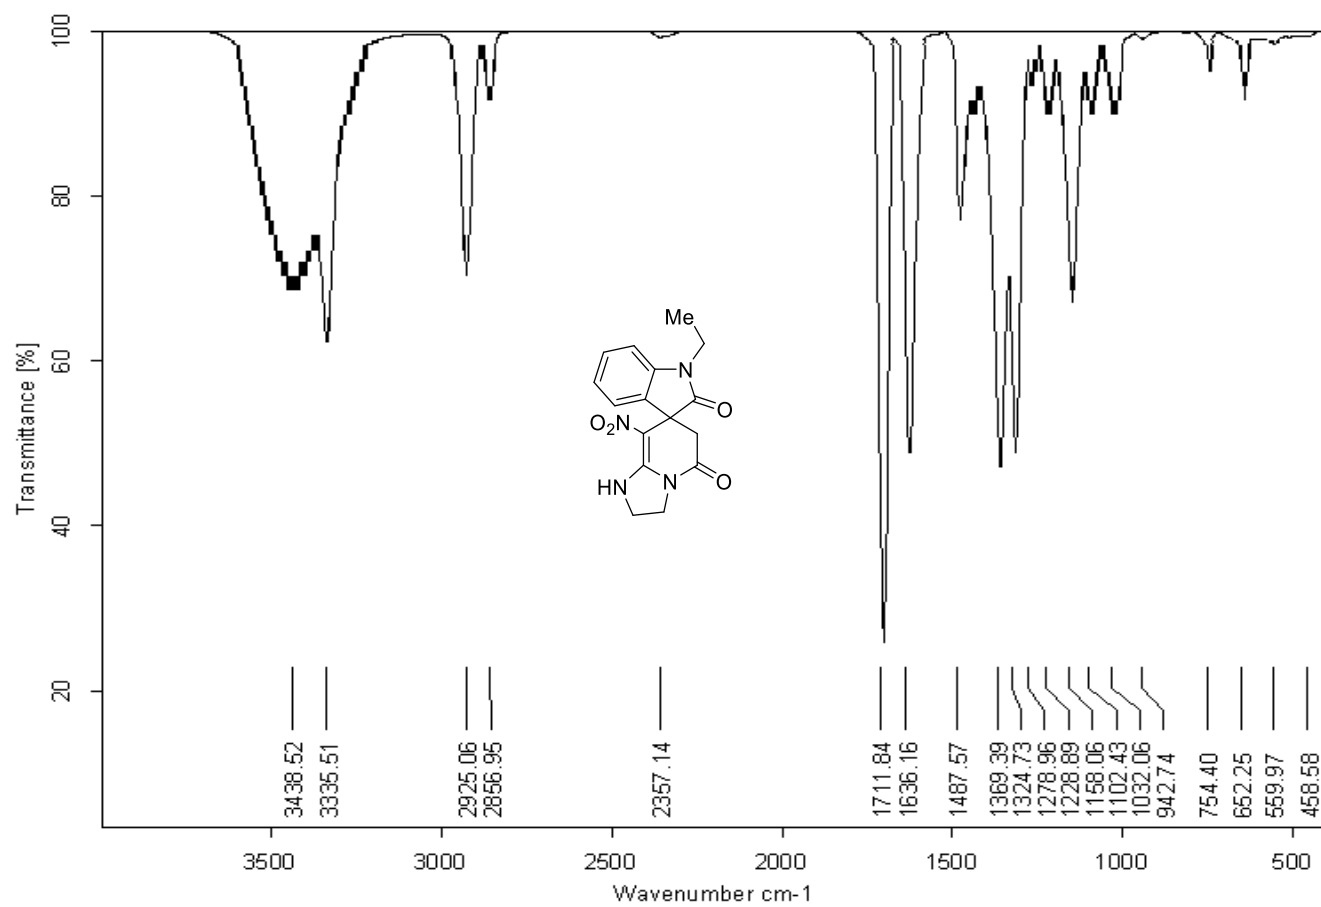

IR of 5c

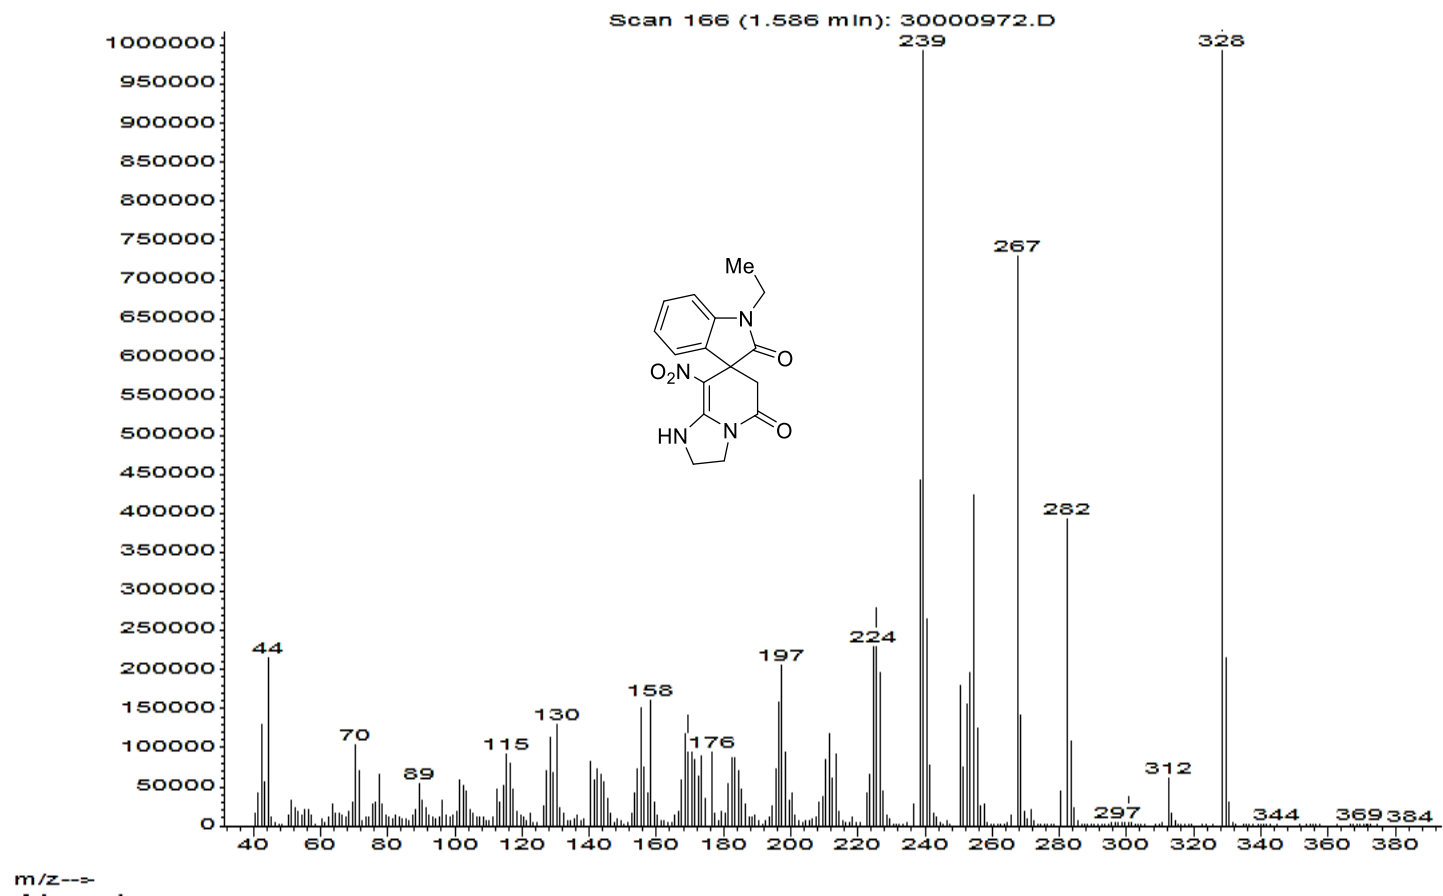

Mass of 6c



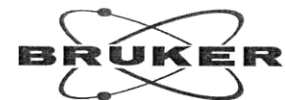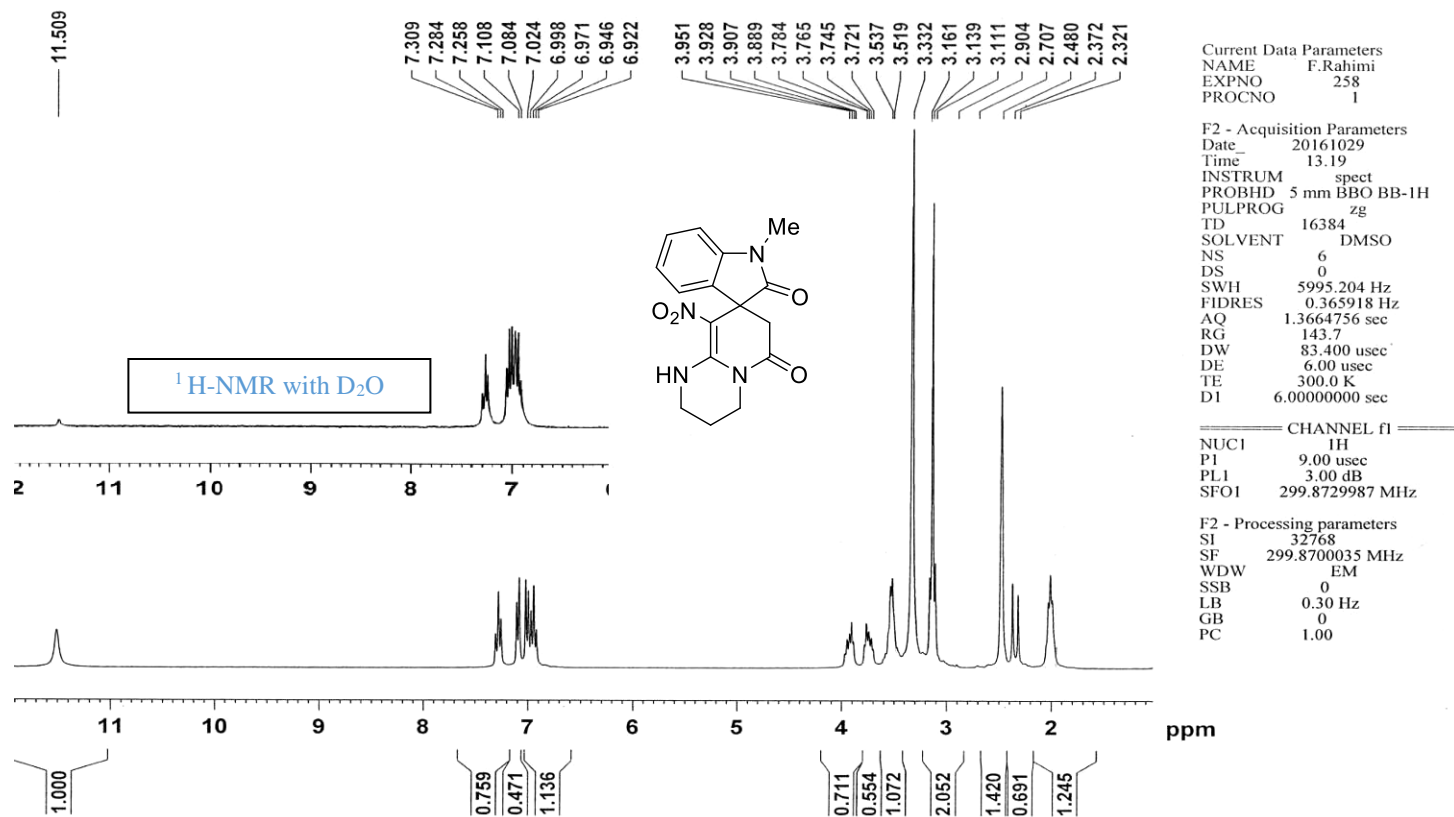<sup>1</sup>H NMR of 5d

In the spectrum taken in DMSO, three carbon signals are lost, but when the chloroform was used (which solves product **5d** well), the three signals appeared (two spectrums below):

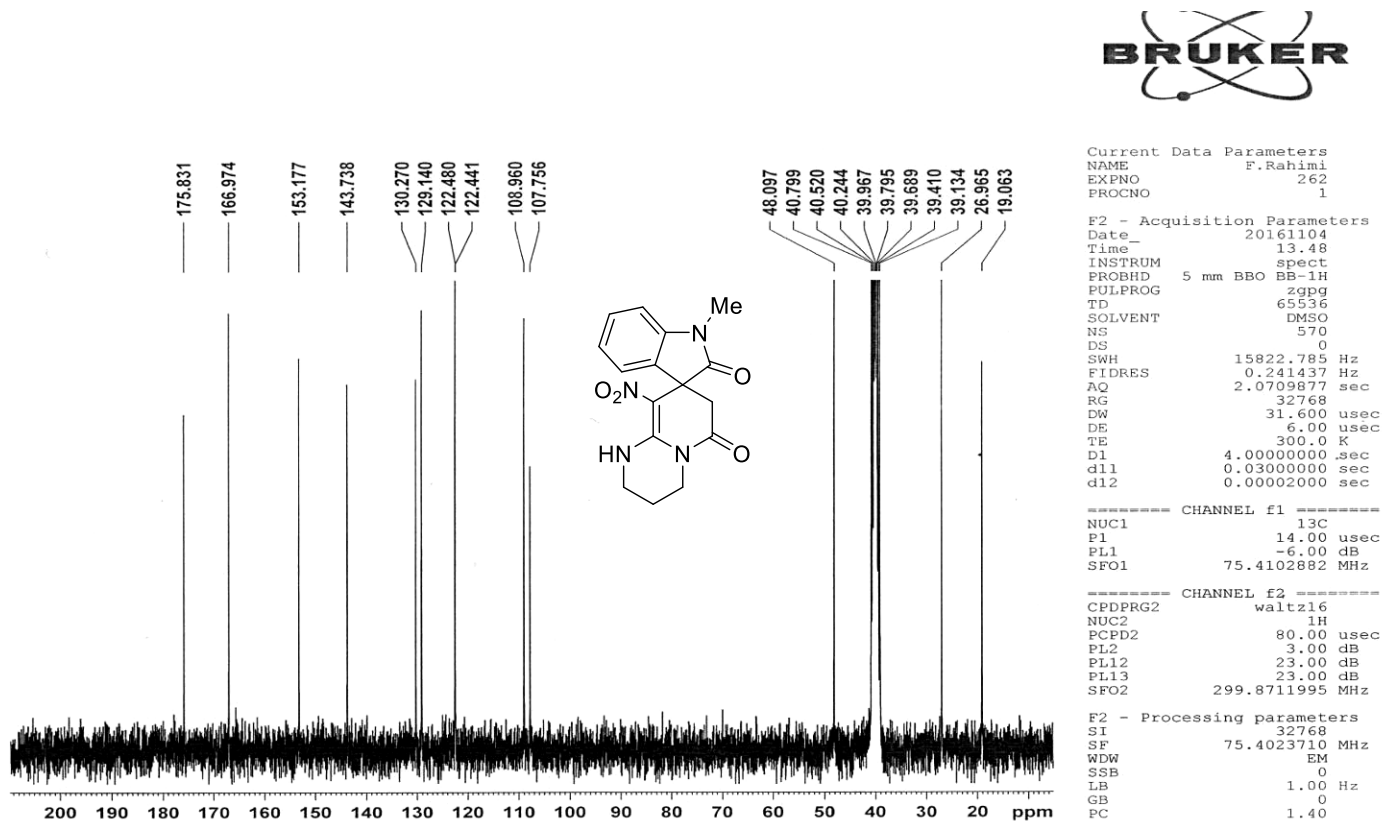

<sup>13</sup>C NMR of **5d** (in DMSO)

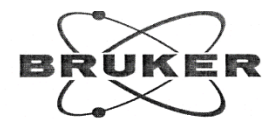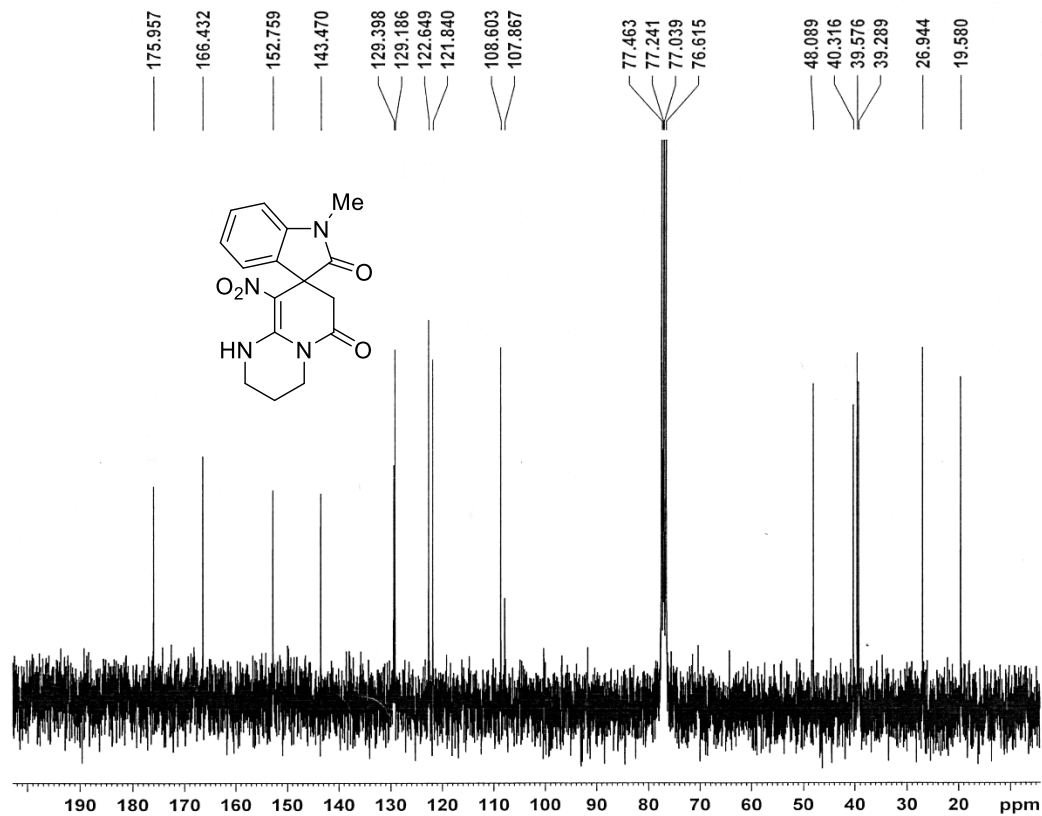

<sup>13</sup>C NMR of 5d (in CDCl<sub>3</sub>)

Current Data Parameters  
 NAME F.Rahimi  
 EXPNO 266  
 PROCNO 1

F2 - Acquisition Parameters  
 Date\_ 20161120  
 Time\_ 11.49  
 INSTRUM spect  
 PROBHD 5 mm BBO BB-1H  
 PULPROG zgpg  
 TD 65536  
 SOLVENT DMSO  
 NS 1000  
 DS 0  
 SWH 15822.785 Hz  
 FIDRES 0.241437 Hz  
 AQ 2.0709877 sec  
 RG 32768  
 DW 31.600 usec  
 DE 6.00 usec  
 TE 300.0 K  
 D1 4.00000000 sec  
 d11 0.03000000 sec  
 d12 0.00002000 sec

===== CHANNEL f1 =====  
 NUC1 13C  
 P1 14.00 usec  
 PL1 -6.00 dB  
 SFO1 75.4102882 MHz

===== CHANNEL f2 =====  
 CPDPRG2 waltz16  
 NUC2 1H  
 PCPD2 80.00 usec  
 PL2 3.00 dB  
 PL12 23.00 dB  
 PL13 23.00 dB  
 SFO2 299.8711995 MHz

F2 - Processing parameters  
 SI 32768  
 SF 75.4023710 MHz  
 WDW EM  
 SSB 0  
 LB 1.00 Hz  
 GB 0  
 PC 1.40

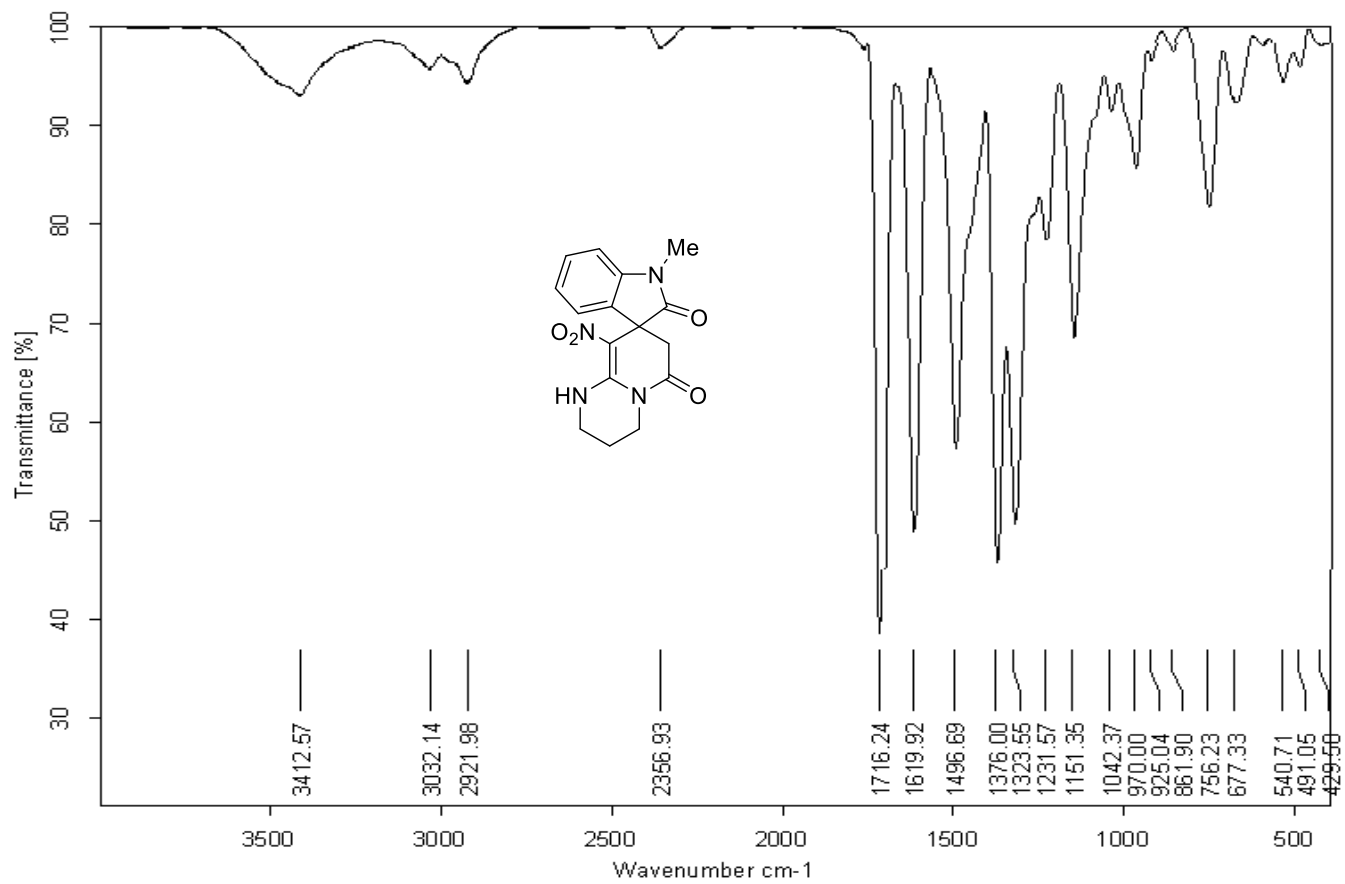

IR of 5d

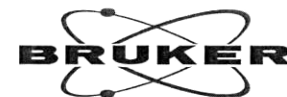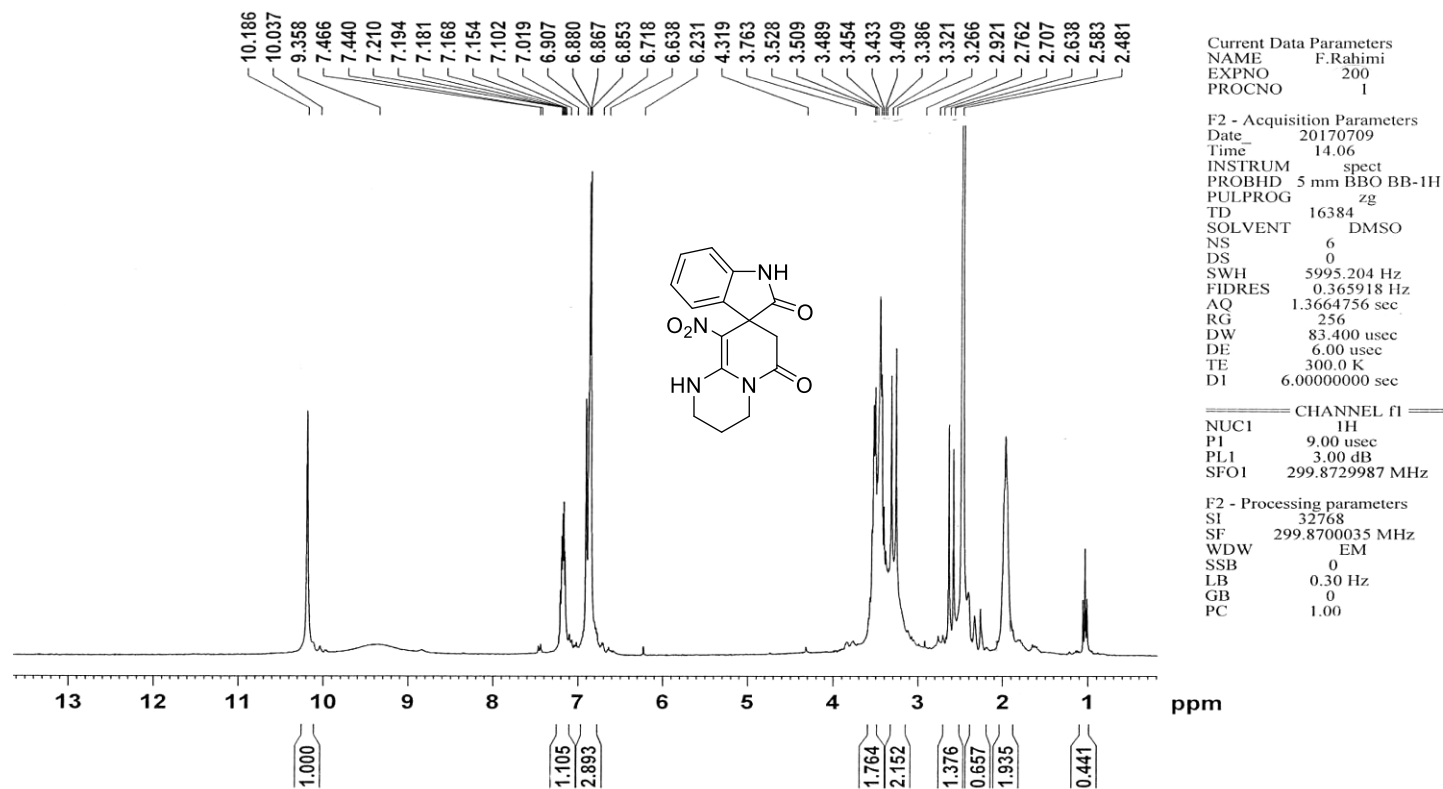

<sup>1</sup>H NMR of 5e

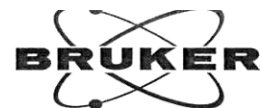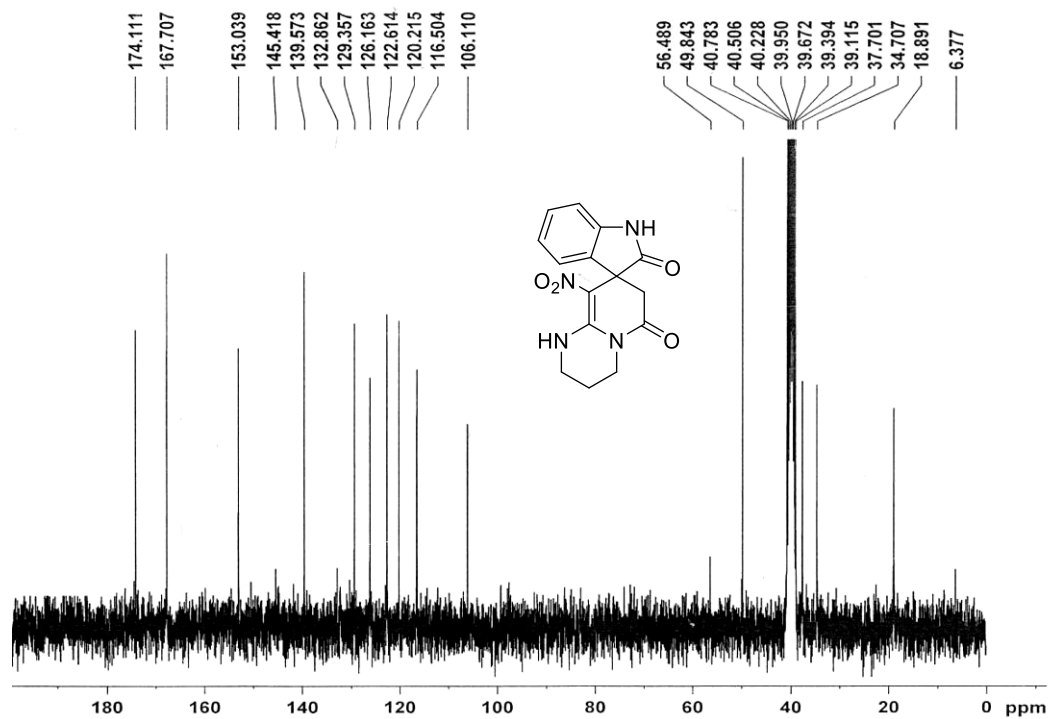 $^{13}\text{C}$  NMR of 5e

Current Data Parameters  
 NAME F.Rahimi  
 EXPNO 218  
 PROCNO 1

F2 - Acquisition Parameters  
 Date\_ 20170828  
 Time\_ 10.08  
 INSTRUM spect  
 PROBHD 5 mm BBO BB-1H  
 PULPROG zgpg  
 TD 65536  
 SOLVENT DMSO  
 NS 500  
 DS 0  
 SWH 15822.785 Hz  
 FIDRES 0.241437 Hz  
 AQ 2.0709877 sec  
 RG 32768  
 DW 31.600 usec  
 DE 6.00 usec  
 TE 300.0 K  
 D1 4.00000000 sec  
 d11 0.03000000 sec  
 d12 0.00002000 sec

===== CHANNEL f1 =====  
 NUC1 13C  
 P1 14.00 usec  
 PL1 -6.00 dB  
 SFO1 75.4102882 MHz

===== CHANNEL f2 =====  
 CPDPRG2 waltz16  
 NUC2 1H  
 PCPD2 80.00 usec  
 PL2 3.00 dB  
 PL12 23.00 dB  
 PL13 23.00 dB  
 SFO2 299.8711995 MHz

F2 - Processing parameters  
 SI 32768  
 SF 75.4023710 MHz  
 WDW EM  
 SSB 0  
 LB 1.00 Hz  
 GB 0  
 PC 1.40

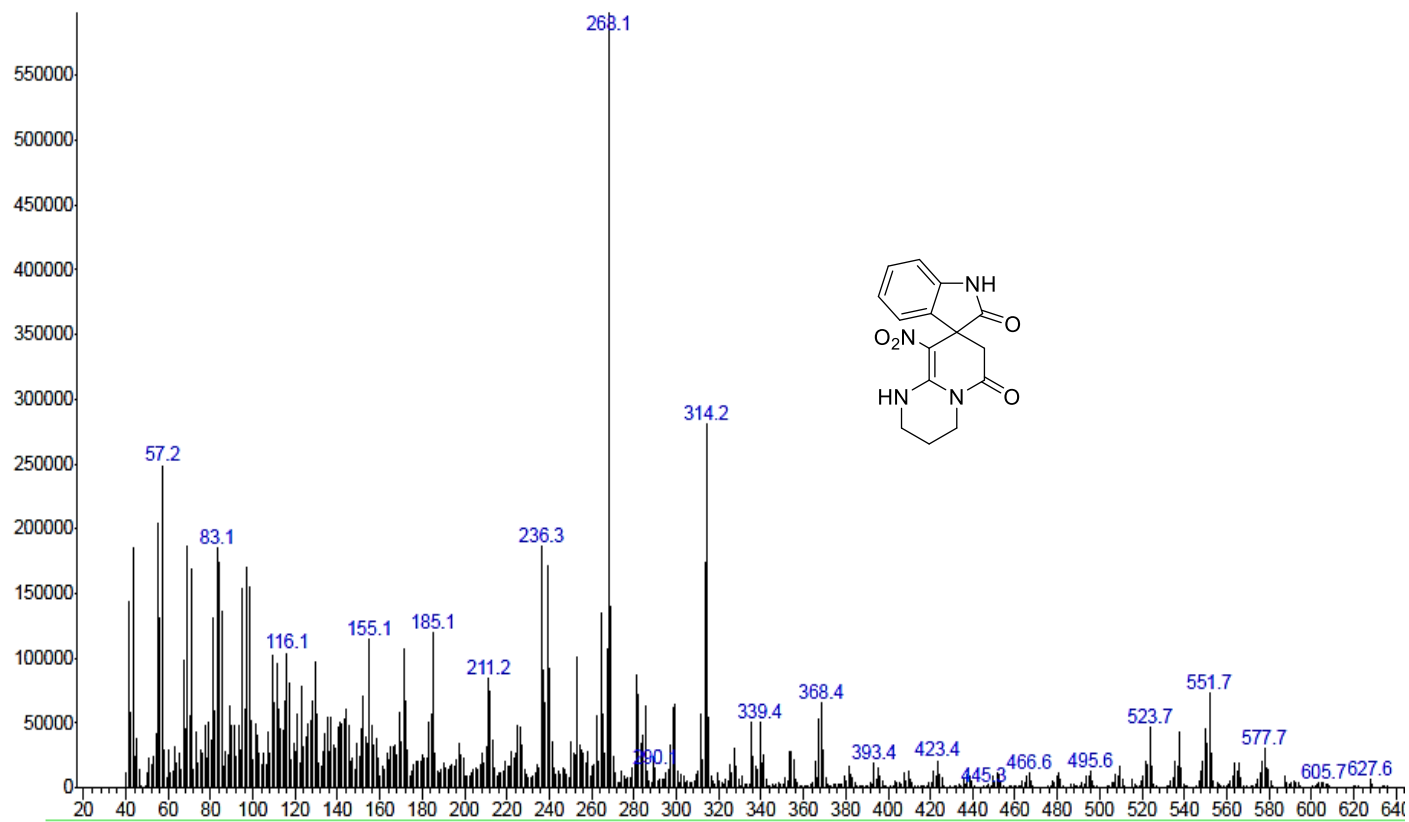

Mass of 5e

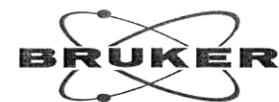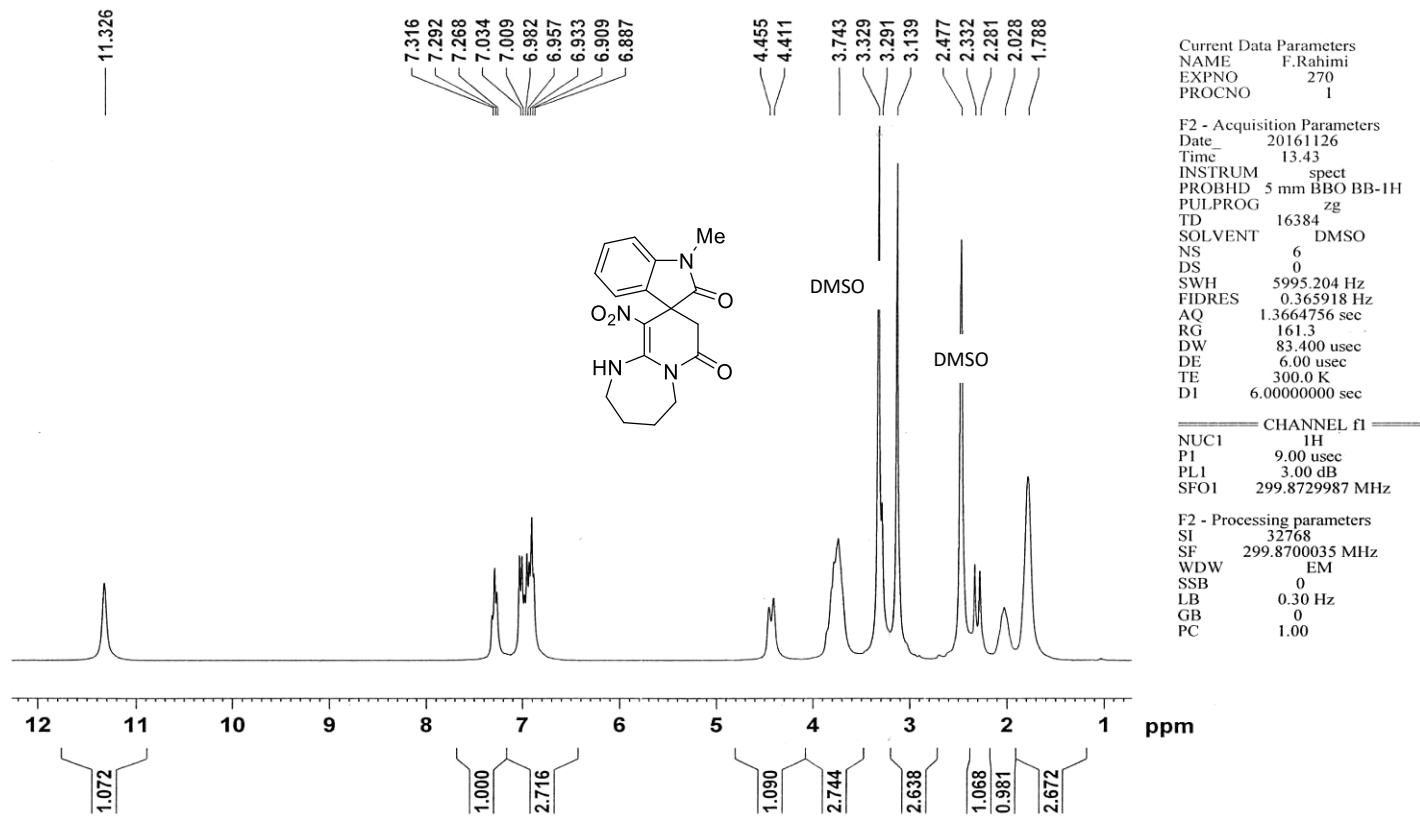

<sup>1</sup>H NMR of 5f



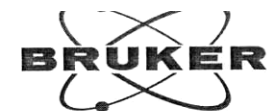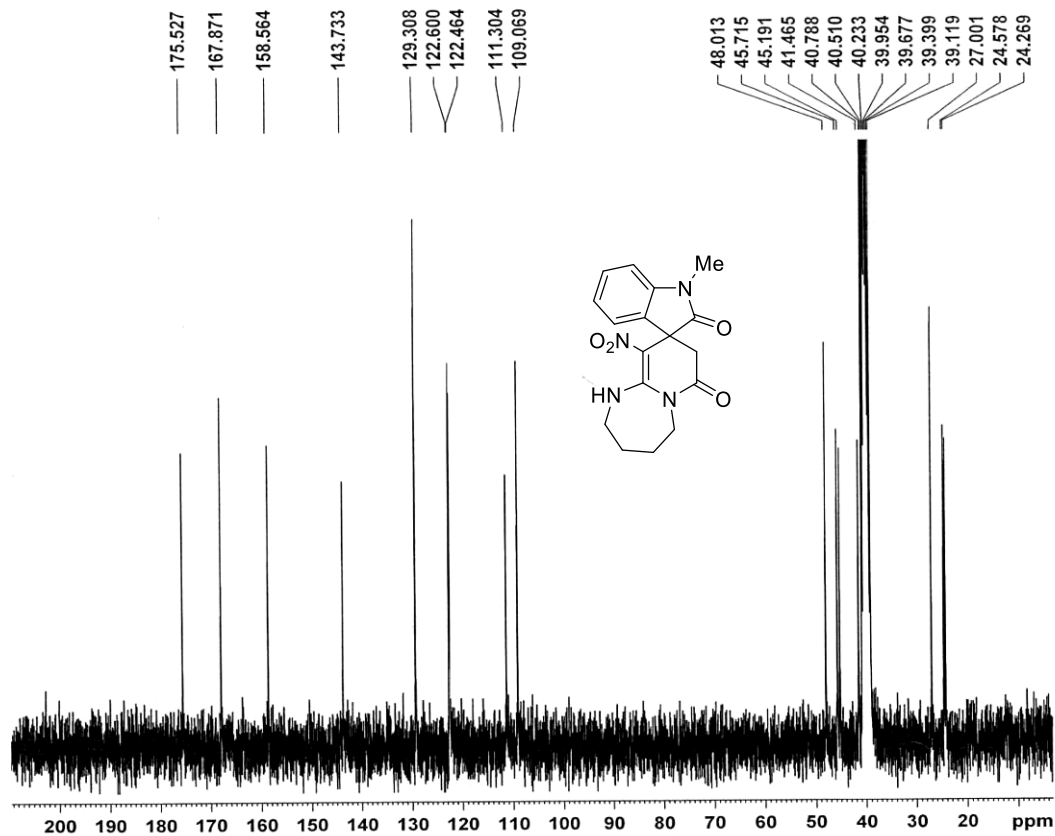

Current Data Parameters  
 NAME F.Rahimi  
 EXPNO 276  
 PROCNO 1

F2 - Acquisition Parameters  
 Date\_ 20161203  
 Time\_ 10.25  
 INSTRUM spect  
 PROBHD 5 mm BBO BB-1H  
 PULPROG zgpg  
 TD 65536  
 SOLVENT DMSO  
 NS 500  
 DS 0  
 SWH 15822.785 Hz  
 FIDRES 0.241437 Hz  
 AQ 2.0709877 sec  
 RG 32768  
 DW 31.600 usec  
 DE 6.00 usec  
 TE 300.0 K  
 D1 4.00000000 sec  
 d11 0.03000000 sec  
 d12 0.00002000 sec

===== CHANNEL f1 =====  
 NUC1 13C  
 P1 14.00 usec  
 PL1 -6.00 dB  
 SFO1 75.4102882 MHz

===== CHANNEL f2 =====  
 CPDPRG2 waltz16  
 NUC2 1H  
 PCPD2 80.00 usec  
 PL2 3.00 dB  
 PL12 23.00 dB  
 PL13 23.00 dB  
 SFO2 299.8711995 MHz

F2 - Processing parameters  
 SI 32768  
 SF 75.4023710 MHz  
 WDW EM  
 SSB 0  
 LB 1.00 Hz  
 GB 0  
 PC 1.40

<sup>13</sup>C NMR of 5f

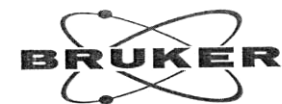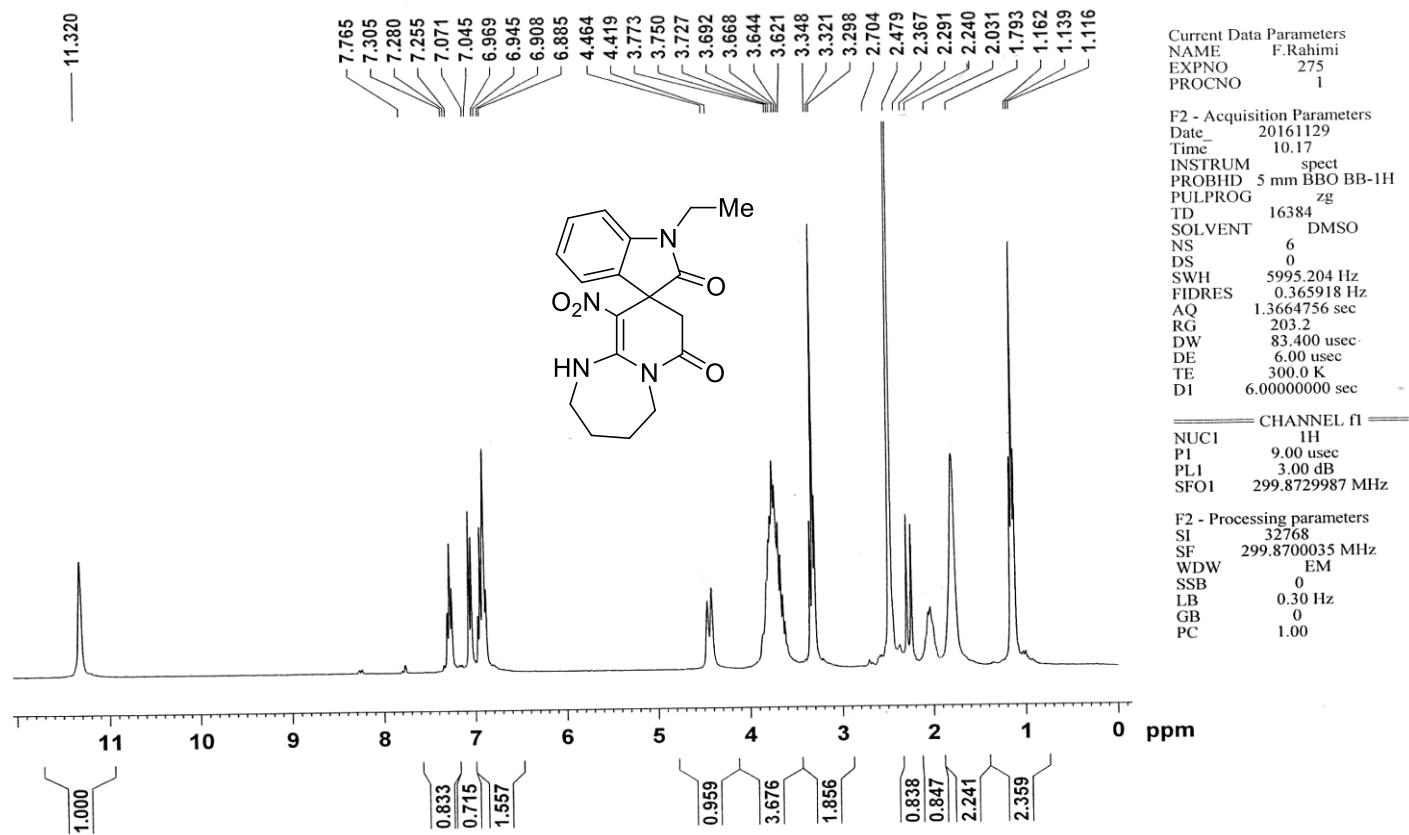

<sup>1</sup>H NMR of 5g

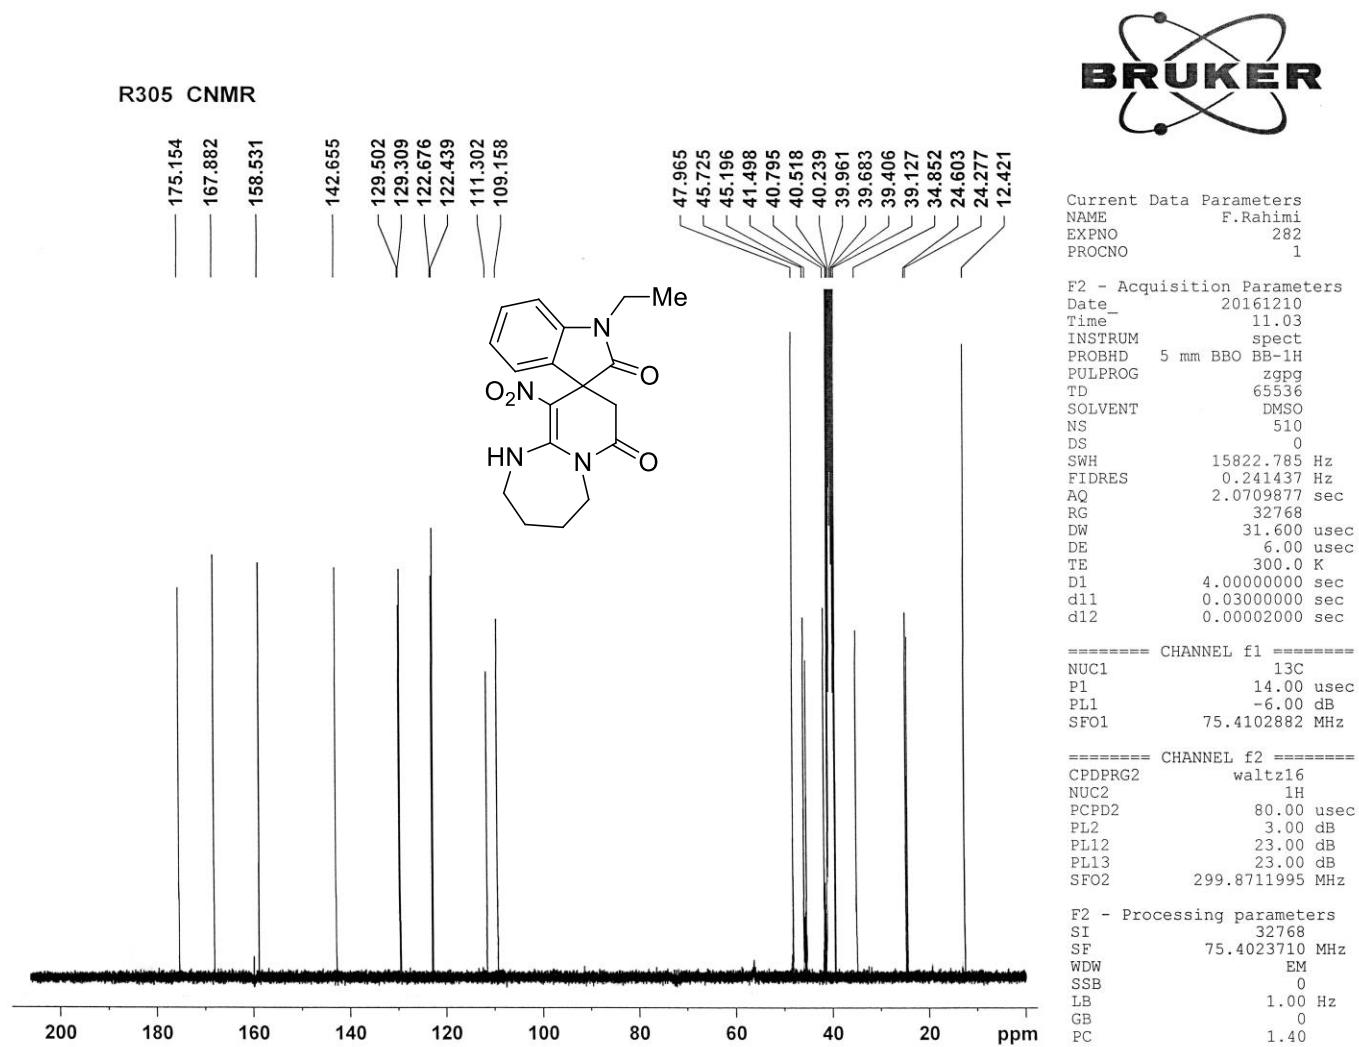

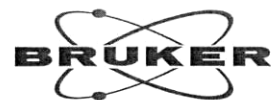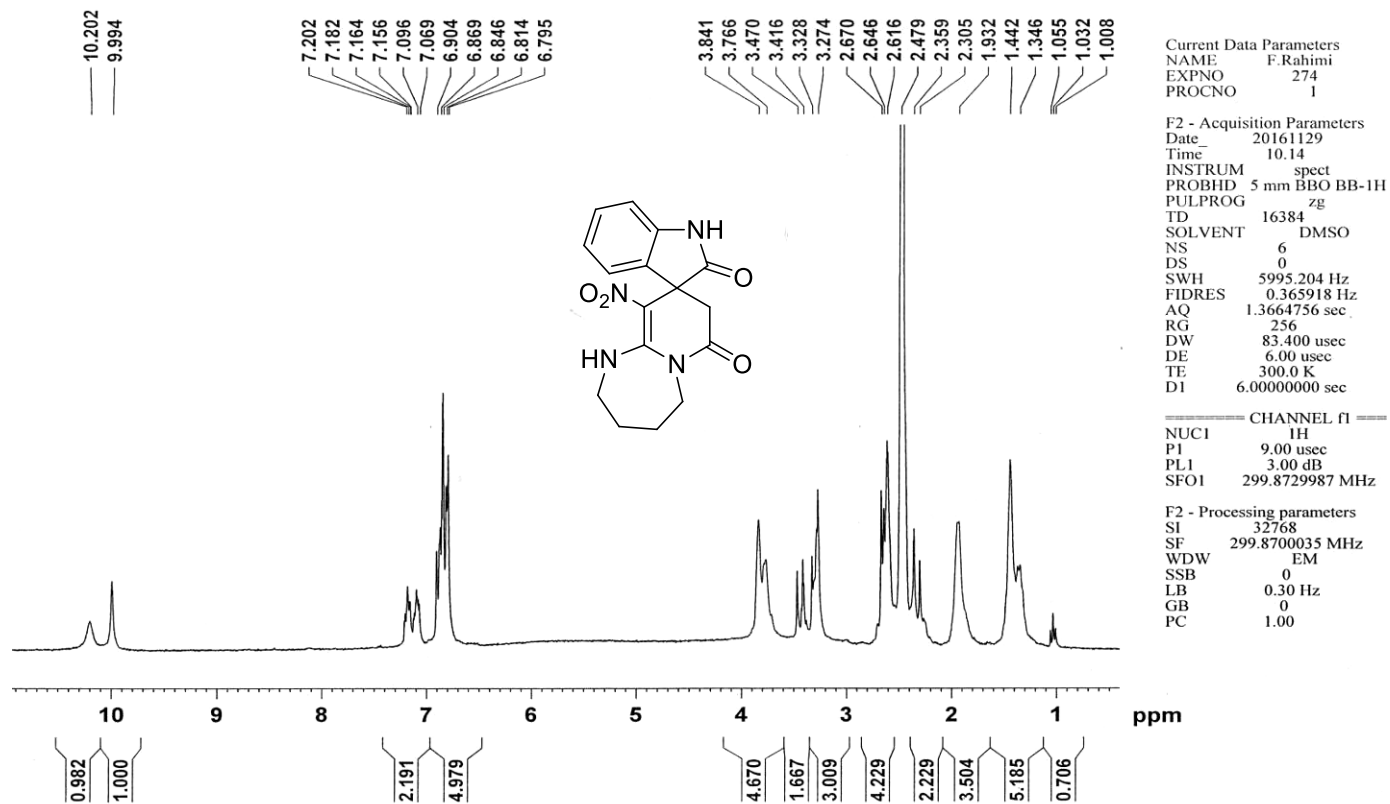

R234/3 CNMR

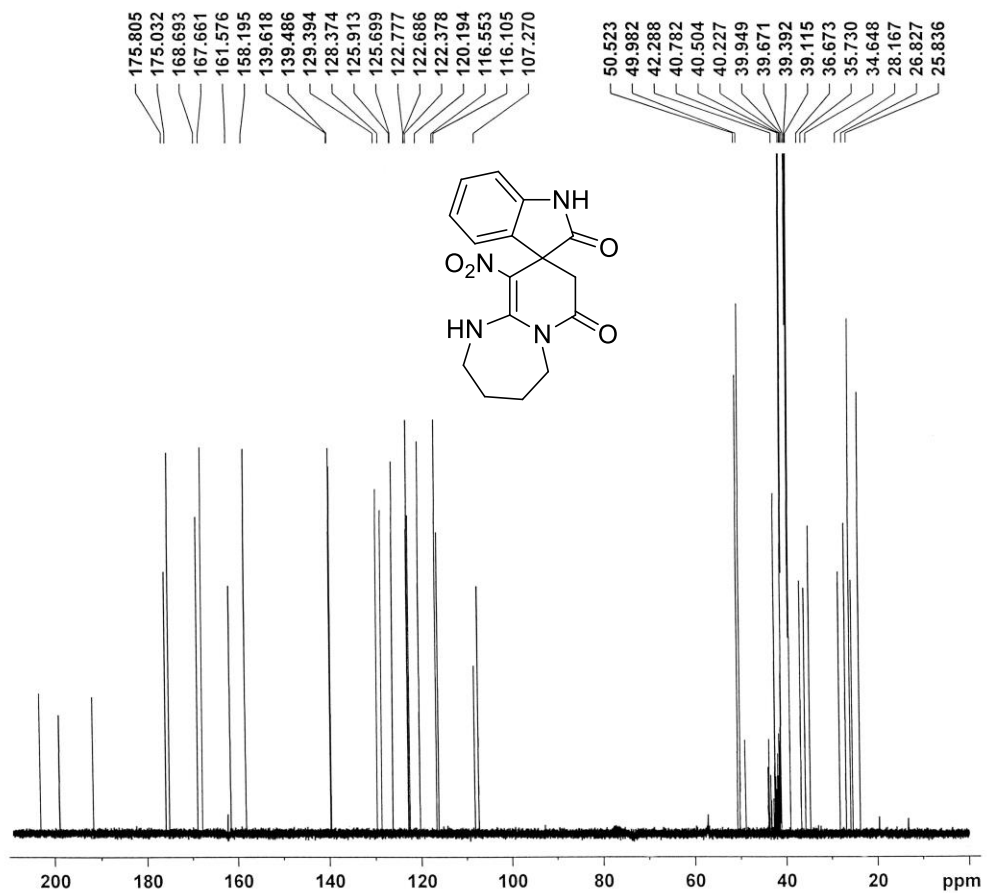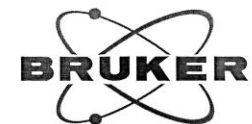

Current Data Parameters  
 NAME F. Rahimi  
 EXPNO 281  
 PROCNO 1

F2 - Acquisition Parameters  
 Date\_ 20161210  
 Time\_ 10.03  
 INSTRUM spect  
 PROBHD 5 mm BBO BB-1H  
 PULPROG zgpg  
 TD 65536  
 SOLVENT DMSO  
 NS 1200  
 DS 0  
 SWH 15822.785 Hz  
 FIDRES 0.241437 Hz  
 AQ 2.0709877 sec  
 RG 32768  
 DW 31.600 usec  
 DE 6.00 usec  
 TE 300.0 K  
 D1 4.0000000 sec  
 d11 0.0300000 sec  
 d12 0.00002000 sec

===== CHANNEL f1 =====  
 NUC1 13C  
 P1 14.00 usec  
 PL1 -6.00 dB  
 SFO1 75.4102882 MHz

===== CHANNEL f2 =====  
 CPDPRG2 waltz16  
 NUC2 1H  
 PCPD2 80.00 usec  
 PL2 3.00 dB  
 PL12 23.00 dB  
 PL13 23.00 dB  
 SFO2 299.8711995 MHz

F2 - Processing parameters  
 SI 32768  
 SF 75.4023710 MHz  
 WDW EM  
 SSB 0  
 LB 1.00 Hz  
 GB 0  
 PC 1.40

<sup>13</sup>C NMR of 5h

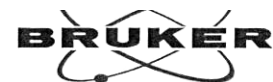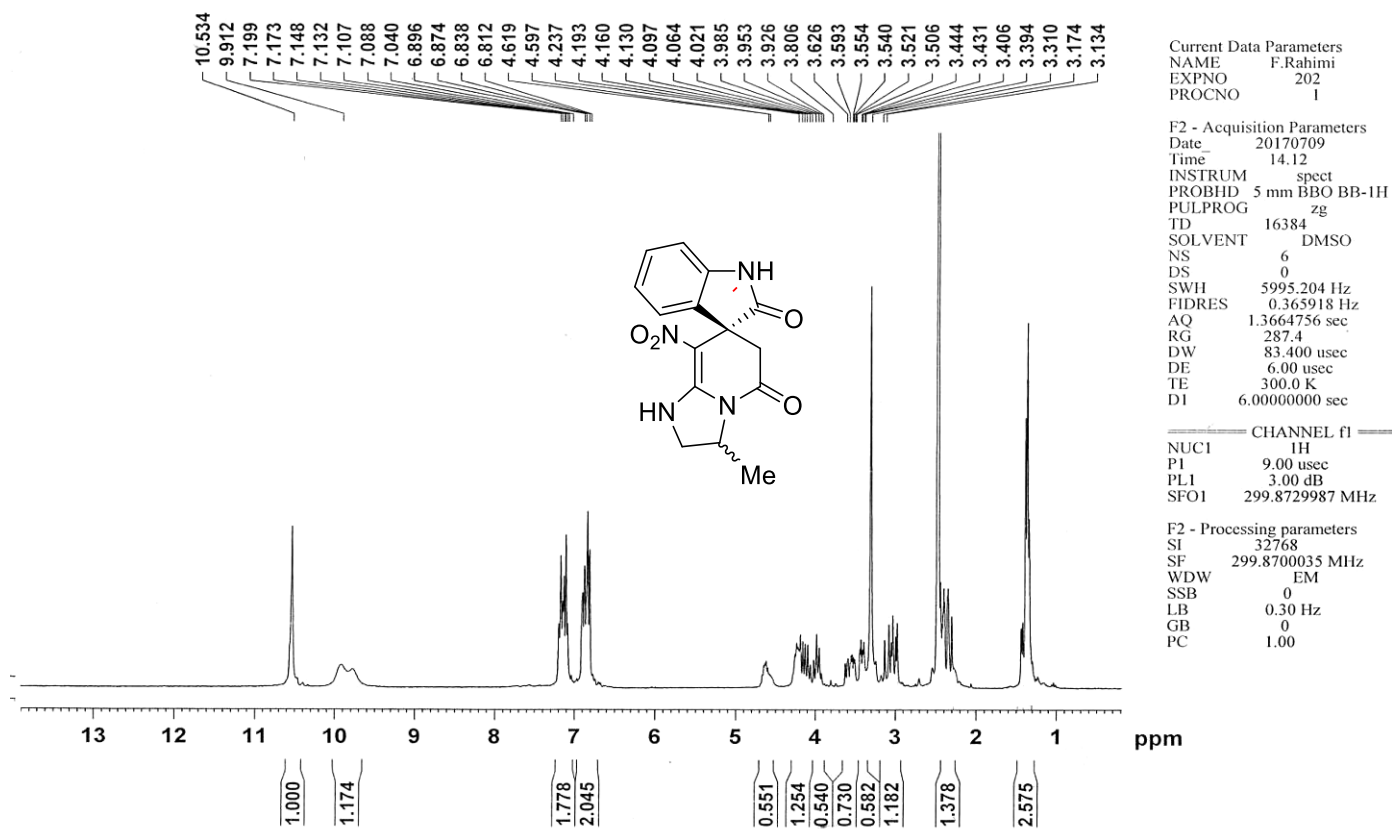

<sup>1</sup>H NMR of 5i

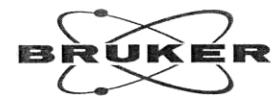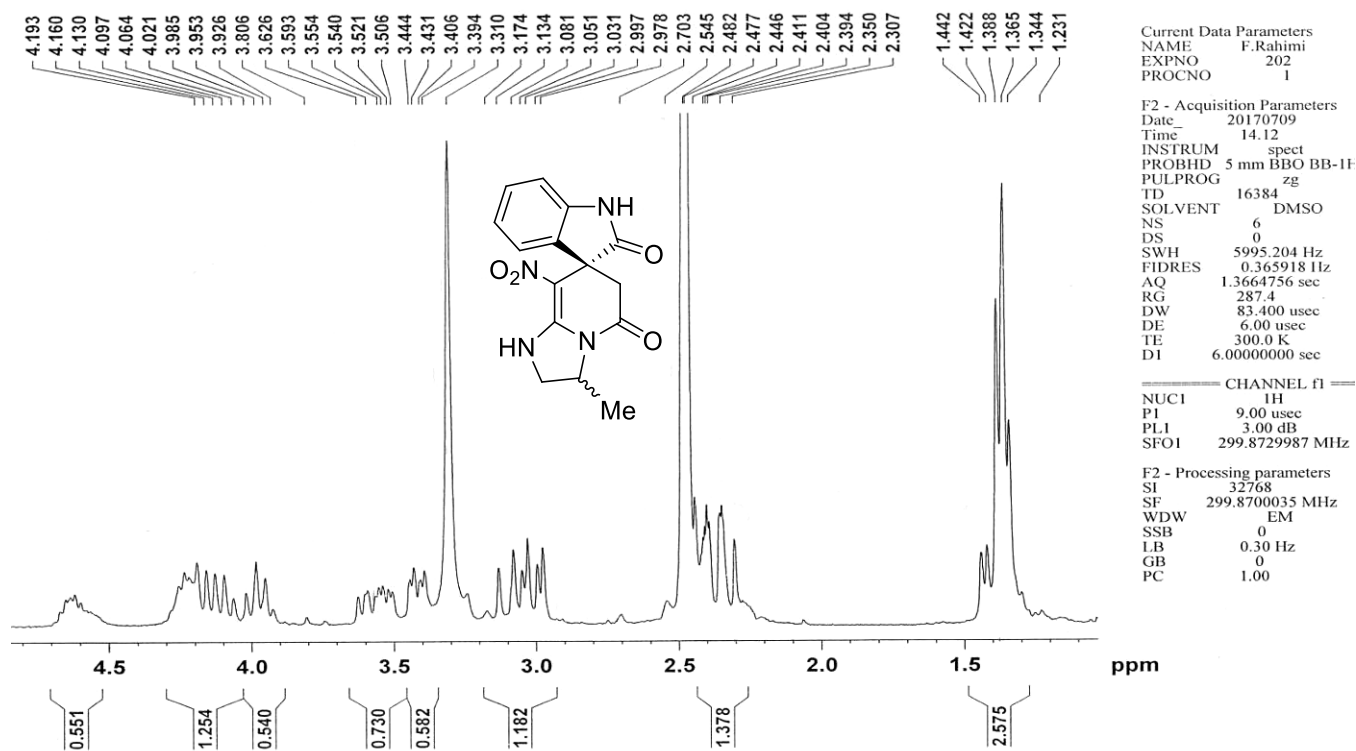

<sup>1</sup>H expand of 5i

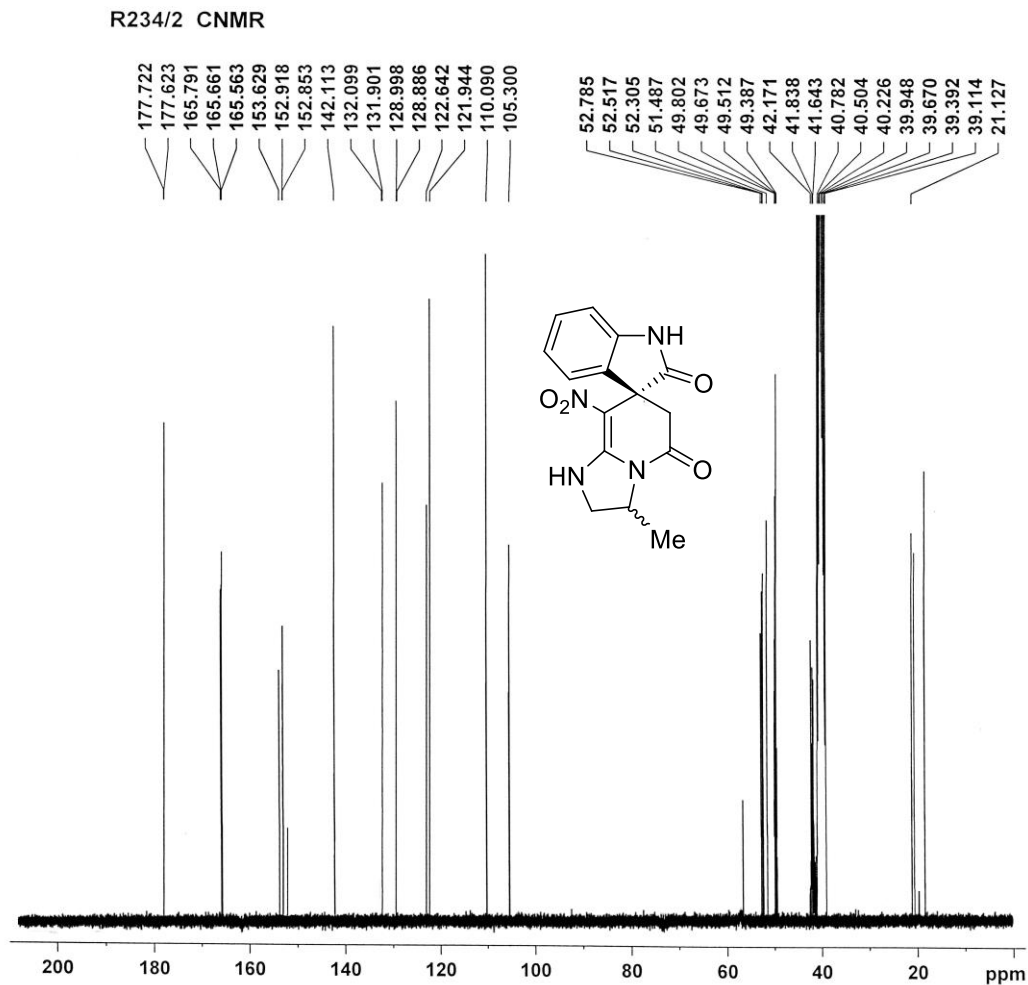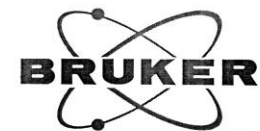

Current Data Parameters  
 NAME F.Rahimi  
 EXPNO 217  
 PROCNO 1

F2 - Acquisition Parameters  
 Date\_ 20170828  
 Time 9.13  
 INSTRUM spect  
 PROBHD 5 mm BBO BB-1H  
 PULPROG zgpg  
 TD 65536  
 SOLVENT DMSO  
 NS 500  
 DS 0  
 SWH 15822.785 Hz  
 FIDRES 0.241437 Hz  
 AQ 2.0709877 sec  
 RG 32768  
 DW 31.600 usec  
 DE 6.00 usec  
 TE 300.0 K  
 D1 4.00000000 sec  
 d11 0.03000000 sec  
 d12 0.00002000 sec

===== CHANNEL f1 =====  
 NUC1 13C  
 P1 14.00 usec  
 PL1 -6.00 dB  
 SFO1 75.4102882 MHz

===== CHANNEL f2 =====  
 CPDPRG2 waltz16  
 NUC2 1H  
 PCPD2 80.00 usec  
 PL2 3.00 dB  
 PL12 23.00 dB  
 PL13 23.00 dB  
 SFO2 299.8711995 MHz

F2 - Processing parameters  
 SI 32768  
 SF 75.4023710 MHz  
 WDW EM  
 SSB 0  
 LB 1.00 Hz  
 GB 0  
 PC 1.40

<sup>13</sup>C NMR of 5i



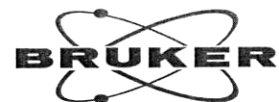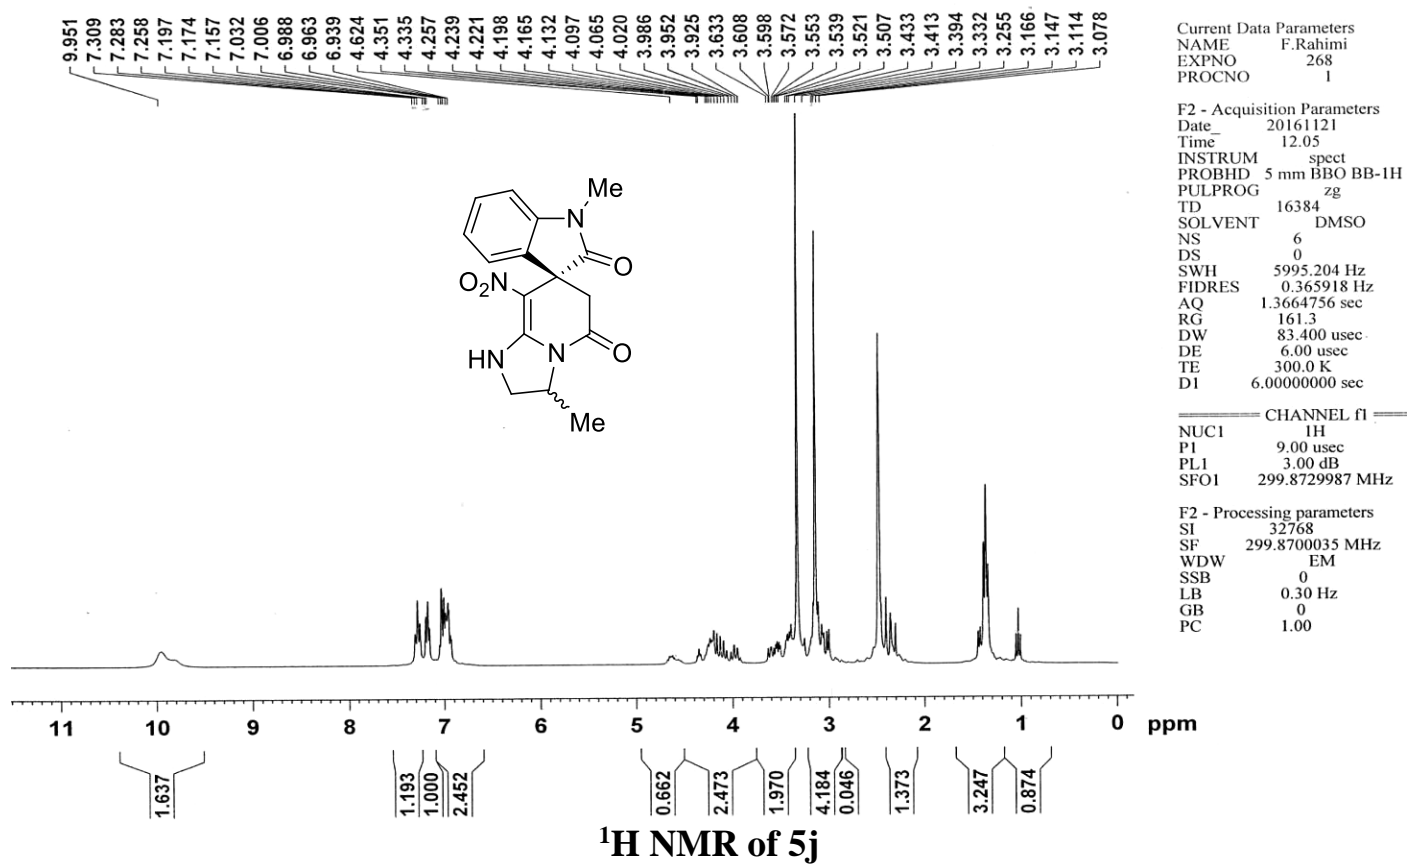

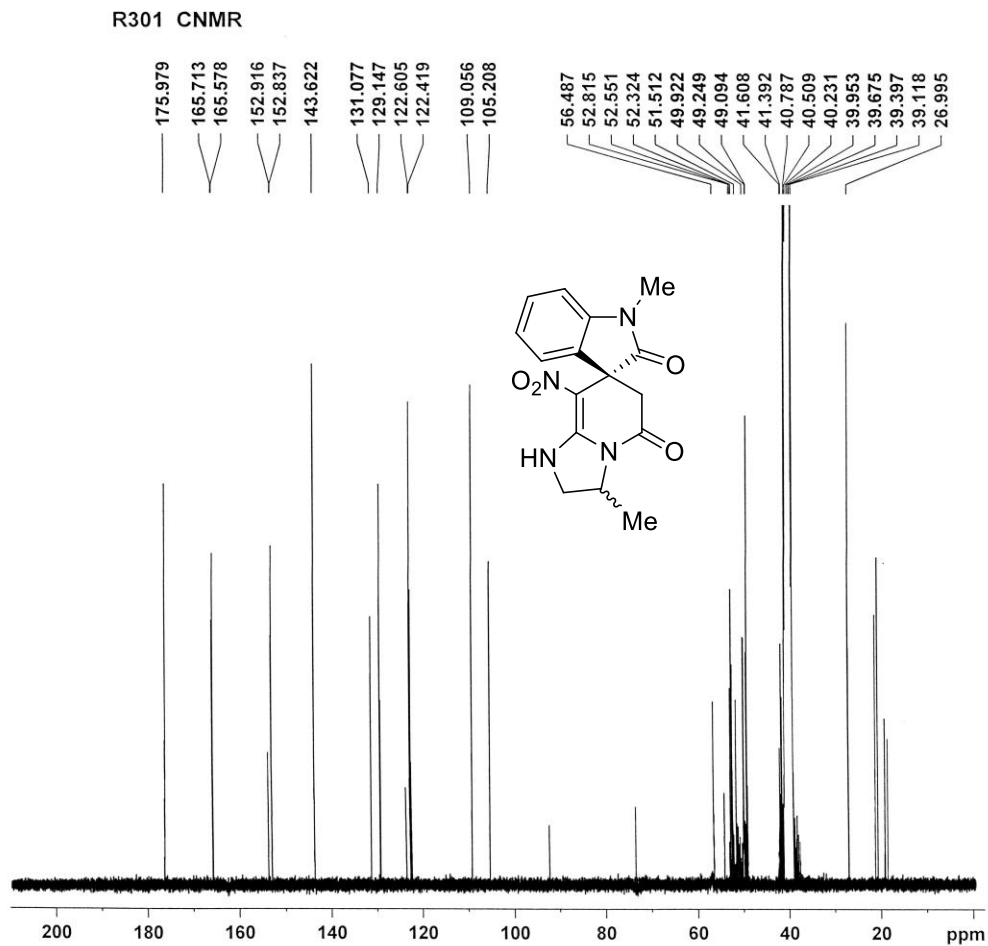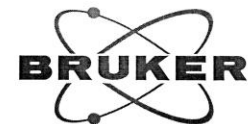

Current Data Parameters  
 NAME F.Rahimi  
 EXPNO 269  
 PROCNO 1

F2 - Acquisition Parameters  
 Date\_ 20161121  
 Time 13.25  
 INSTRUM spect  
 PROBHD 5 mm BBO BB-1H  
 PULPROG zgpg  
 TD 65536  
 SOLVENT DMSO  
 NS 730  
 DS 0  
 SWH 15822.785 Hz  
 FIDRES 0.241437 Hz  
 AQ 2.0709877 sec  
 RG 32768  
 DW 31.600 usec  
 DE 6.00 usec  
 TE 300.0 K  
 D1 4.0000000 sec  
 d11 0.0300000 sec  
 d12 0.00002000 sec

===== CHANNEL f1 =====  
 NUC1 13C  
 P1 14.00 usec  
 PL1 -6.00 dB  
 SFO1 75.4102882 MHz

===== CHANNEL f2 =====  
 CPDPRG2 waltz16  
 NUC2 1H  
 PCPD2 80.00 usec  
 PL2 3.00 dB  
 PL12 23.00 dB  
 PL13 23.00 dB  
 SFO2 299.8711995 MHz

F2 - Processing parameters  
 SI 32768  
 SF 75.4023710 MHz  
 WDW EM  
 SSB 0  
 LB 1.00 Hz  
 GB 0  
 PC 1.40

$^{13}\text{C}$  NMR of 5j
